# Supplementary material
Source: PubMed Central journal article supplement (PMC7166856)
Supplement: JBI-31-1579-s002.pdf [file JBI-31-1579-s002.pdf]

|                 |               |                   |   |   |   |   |   |   |   |   |   |   |   |   |   |   |   |   |   |   |   |   |   |   |   |   |   |   |    |    |
|-----------------|---------------|-------------------|---|---|---|---|---|---|---|---|---|---|---|---|---|---|---|---|---|---|---|---|---|---|---|---|---|---|----|----|
| Dryopteridaceae | Ctenitis      | mascarenarum      | 0 | 0 | 0 | 0 | 0 | 0 | 0 | 0 | 0 | 0 | 0 | 0 | 0 | 0 | 0 | 0 | 0 | 0 | 0 | 0 | 0 | 0 | 0 | 0 | 0 | 1 | 1  |    |
| Dryopteridaceae | Ctenitis      | poolii            | 0 | 0 | 0 | 0 | 0 | 0 | 0 | 0 | 0 | 0 | 0 | 0 | 0 | 0 | 0 | 0 | 0 | 0 | 0 | 0 | 0 | 0 | 0 | 0 | 0 | 1 | 1  |    |
| Dryopteridaceae | Ctenitis      | pseudoperrieriana | 0 | 0 | 0 | 0 | 0 | 0 | 0 | 0 | 0 | 0 | 0 | 0 | 0 | 0 | 0 | 0 | 0 | 0 | 0 | 0 | 0 | 0 | 0 | 0 | 0 | 1 | 1  |    |
| Dryopteridaceae | Ctenitis      | truncicola        | 0 | 0 | 0 | 0 | 0 | 0 | 0 | 0 | 0 | 0 | 0 | 0 | 0 | 0 | 0 | 0 | 0 | 0 | 0 | 0 | 0 | 0 | 0 | 0 | 0 | 1 | 1  |    |
| Dryopteridaceae | Cystopteris   | fragilis          | 0 | 0 | 0 | 1 | 1 | 0 | 0 | 0 | 1 | 0 | 0 | 1 | 1 | 0 | 1 | 1 | 0 | 0 | 0 | 0 | 0 | 0 | 0 | 0 | 1 | 1 | 11 |    |
| Dryopteridaceae | Didymochlaena | truncatula        | 0 | 0 | 0 | 1 | 1 | 0 | 1 | 0 | 1 | 0 | 0 | 0 | 1 | 1 | 1 | 1 | 1 | 0 | 0 | 0 | 1 | 0 | 0 | 0 | 0 | 1 | 11 |    |
| Dryopteridaceae | Diplazium     | arborescens       | 1 | 1 | 0 | 0 | 0 | 0 | 1 | 0 | 1 | 0 | 0 | 0 | 0 | 1 | 1 | 1 | 0 | 0 | 0 | 0 | 0 | 0 | 0 | 0 | 0 | 1 | 8  |    |
| Dryopteridaceae | Diplazium     | caudatum          | 0 | 0 | 0 | 0 | 0 | 0 | 0 | 0 | 0 | 0 | 0 | 0 | 0 | 0 | 0 | 0 | 0 | 0 | 0 | 0 | 0 | 0 | 0 | 0 | 1 | 0 | 1  |    |
| Dryopteridaceae | Diplazium     | humbertii         | 0 | 0 | 0 | 0 | 0 | 0 | 0 | 0 | 0 | 0 | 0 | 0 | 0 | 0 | 1 | 0 | 0 | 0 | 0 | 0 | 0 | 0 | 0 | 0 | 0 | 0 | 1  |    |
| Dryopteridaceae | Diplazium     | nigropaleaceum    | 0 | 0 | 0 | 0 | 0 | 0 | 0 | 0 | 0 | 0 | 0 | 0 | 0 | 0 | 0 | 0 | 0 | 0 | 0 | 0 | 0 | 0 | 1 | 0 | 0 | 0 | 1  |    |
| Dryopteridaceae | Diplazium     | proliferum        | 1 | 1 | 1 | 0 | 1 | 0 | 1 | 1 | 1 | 1 | 0 | 0 | 0 | 1 | 0 | 1 | 0 | 0 | 0 | 0 | 0 | 1 | 0 | 0 | 0 | 0 | 1  | 12 |
| Dryopteridaceae | Diplazium     | pseudoporrectum   | 0 | 0 | 0 | 0 | 0 | 0 | 0 | 0 | 0 | 0 | 0 | 0 | 0 | 0 | 1 | 0 | 0 | 0 | 0 | 0 | 0 | 0 | 0 | 0 | 0 | 0 | 1  |    |
| Dryopteridaceae | Diplazium     | sammatii          | 1 | 1 | 0 | 0 | 1 | 1 | 0 | 0 | 0 | 0 | 1 | 0 | 0 | 0 | 0 | 0 | 0 | 0 | 0 | 0 | 0 | 0 | 0 | 0 | 0 | 0 | 5  |    |
| Dryopteridaceae | Diplazium     | welwitschii       | 1 | 1 | 0 | 0 | 1 | 1 | 0 | 0 | 1 | 0 | 1 | 0 | 0 | 0 | 0 | 0 | 0 | 0 | 0 | 0 | 0 | 1 | 0 | 0 | 0 | 0 | 7  |    |
| Dryopteridaceae | Diplazium     | virchowii         | 0 | 0 | 0 | 0 | 0 | 0 | 0 | 0 | 0 | 0 | 0 | 0 | 0 | 0 | 0 | 0 | 0 | 0 | 0 | 0 | 0 | 0 | 0 | 0 | 0 | 1 | 1  |    |
| Dryopteridaceae | Diplazium     | zanzibaricum      | 1 | 0 | 0 | 0 | 1 | 0 | 0 | 0 | 0 | 0 | 0 | 0 | 1 | 1 | 1 | 1 | 1 | 0 | 0 | 0 | 0 | 0 | 0 | 0 | 0 | 1 | 8  |    |
| Dryopteridaceae | Dryoathyrium  | boryanum          | 0 | 0 | 0 | 1 | 1 | 0 | 0 | 0 | 1 | 0 | 0 | 0 | 1 | 1 | 1 | 1 | 0 | 0 | 0 | 0 | 0 | 0 | 0 | 0 | 0 | 1 | 8  |    |
| Dryopteridaceae | Dryopteris    | ascensionis       | 0 | 0 | 0 | 0 | 0 | 0 | 0 | 0 | 0 | 0 | 0 | 0 | 0 | 0 | 0 | 0 | 0 | 0 | 0 | 0 | 0 | 0 | 1 | 0 | 0 | 0 | 1  |    |
| Dryopteridaceae | Dryopteris    | athamantica       | 0 | 1 | 0 | 1 | 0 | 0 | 0 | 0 | 0 | 0 | 0 | 0 | 0 | 0 | 1 | 1 | 1 | 0 | 0 | 0 | 1 | 0 | 0 | 0 | 0 | 0 | 6  |    |
| Dryopteridaceae | Dryopteris    | berneri           | 0 | 0 | 0 | 0 | 0 | 0 | 0 | 0 | 0 | 0 | 0 | 0 | 0 | 0 | 0 | 0 | 0 | 0 | 0 | 0 | 0 | 0 | 0 | 0 | 0 | 1 | 1  |    |
| Dryopteridaceae | Dryopteris    | callolepis        | 0 | 0 | 0 | 0 | 0 | 0 | 0 | 0 | 0 | 0 | 0 | 0 | 1 | 0 | 1 | 0 | 1 | 1 | 0 | 0 | 0 | 0 | 0 | 0 | 0 | 0 | 4  |    |
| Dryopteridaceae | Dryopteris    | cognata           | 0 | 0 | 0 | 0 | 0 | 0 | 0 | 0 | 0 | 0 | 0 | 0 | 0 | 0 | 0 | 0 | 0 | 0 | 0 | 0 | 1 | 0 | 0 | 0 | 0 | 0 | 1  |    |
| Dryopteridaceae | Dryopteris    | dracomontana      | 0 | 0 | 0 | 0 | 0 | 0 | 0 | 0 | 0 | 0 | 0 | 0 | 0 | 0 | 0 | 1 | 0 | 0 | 0 | 0 | 0 | 0 | 0 | 0 | 0 | 0 | 1  |    |
| Dryopteridaceae | Dryopteris    | esterhuyseniae    | 0 | 0 | 0 | 0 | 0 | 0 | 0 | 0 | 0 | 0 | 0 | 0 | 0 | 0 | 0 | 0 | 1 | 0 | 0 | 0 | 0 | 0 | 0 | 0 | 0 | 0 | 1  |    |
| Dryopteridaceae | Dryopteris    | fadenii           | 0 | 0 | 0 | 0 | 0 | 0 | 0 | 0 | 0 | 0 | 0 | 0 | 1 | 0 | 0 | 0 | 0 | 0 | 0 | 0 | 0 | 0 | 0 | 0 | 0 | 0 | 1  |    |
| Dryopteridaceae | Dryopteris    | inaequalis        | 0 | 0 | 0 | 0 | 1 | 0 | 1 | 0 | 1 | 0 | 0 | 1 | 1 | 1 | 1 | 1 | 1 | 0 | 0 | 0 | 0 | 0 | 0 | 0 | 1 | 1 | 12 |    |
| Dryopteridaceae | Dryopteris    | kilemensis        | 0 | 0 | 0 | 0 | 1 | 0 | 0 | 0 | 0 | 0 | 0 | 0 | 1 | 1 | 1 | 0 | 0 | 0 | 0 | 0 | 0 | 0 | 0 | 0 | 0 | 0 | 4  |    |
| Dryopteridaceae | Dryopteris    | mangindranensis   | 0 | 0 | 0 | 0 | 0 | 0 | 0 | 0 | 0 | 0 | 0 | 0 | 0 | 0 | 0 | 0 | 0 | 0 | 0 | 0 | 0 | 0 | 0 | 0 | 0 | 1 | 1  |    |
| Dryopteridaceae | Dryopteris    | manniana          | 0 | 0 | 0 | 0 | 1 | 0 | 0 | 0 | 1 | 0 | 1 | 0 | 0 | 0 | 0 | 0 | 0 | 0 | 0 | 0 | 0 | 0 | 0 | 0 | 0 | 1 | 5  |    |
| Dryopteridaceae | Dryopteris    | napoleonis        | 0 | 0 | 0 | 0 | 0 | 0 | 0 | 0 | 0 | 0 | 0 | 0 | 0 | 0 | 0 | 0 | 0 | 0 | 0 | 0 | 1 | 0 | 0 | 0 | 0 | 0 | 1  |    |
| Dryopteridaceae | Dryopteris    | perrieriana       | 0 | 0 | 0 | 0 | 0 | 0 | 0 | 0 | 0 | 0 | 0 | 0 | 0 | 0 | 0 | 0 | 0 | 0 | 0 | 0 | 0 | 0 | 0 | 0 | 0 | 1 | 1  |    |
| Dryopteridaceae | Dryopteris    | remotipinnula     | 0 | 0 | 0 | 0 | 0 | 0 | 0 | 0 | 0 | 0 | 0 | 0 | 0 | 0 | 0 | 0 | 0 | 0 | 0 | 0 | 0 | 0 | 0 | 0 | 0 | 1 | 1  |    |
| Dryopteridaceae | Dryopteris    | schimperiana      | 0 | 0 | 0 | 0 | 0 | 0 | 0 | 0 | 0 | 0 | 0 | 0 | 1 | 1 | 0 | 0 | 0 | 0 | 0 | 0 | 0 | 0 | 0 | 0 | 0 | 0 | 2  |    |
| Dryopteridaceae | Dryopteris    | squamiseta        | 0 | 0 | 0 | 0 | 0 | 0 | 0 | 1 | 0 | 0 | 0 | 0 | 1 | 1 | 1 | 1 | 0 | 0 | 0 | 0 | 0 | 0 | 0 | 0 | 0 | 1 | 6  |    |
| Dryopteridaceae | Dryopteris    | subcrenulata      | 0 | 0 | 0 | 0 | 0 | 0 | 0 | 0 | 0 | 0 | 0 | 0 | 0 | 0 | 0 | 0 | 0 | 0 | 0 | 0 | 0 | 0 | 0 | 0 | 0 | 1 | 1  |    |
| Dryopteridaceae | Dryopteris    | wallichiana       | 0 | 0 | 0 | 0 | 0 | 0 | 0 | 0 | 0 | 0 | 0 | 0 | 0 | 0 | 1 | 0 | 0 | 0 | 0 | 0 | 0 | 0 | 0 | 0 | 1 | 0 | 3  |    |
| Dryopteridaceae | Hypodematium  | crenatum          | 0 | 0 | 0 | 0 | 0 | 0 | 0 | 0 | 0 | 0 | 0 | 1 | 0 | 1 | 0 | 0 | 1 | 0 | 0 | 0 | 1 | 0 | 0 | 0 | 0 | 1 | 1  | 6  |
| Dryopteridaceae | Lastreopsis   | barteriana        | 0 | 0 | 0 | 0 | 1 | 0 | 0 | 0 | 1 | 0 | 1 | 0 | 0 | 0 | 0 | 0 | 0 | 0 | 0 | 0 | 0 | 0 | 0 | 0 | 0 | 0 | 0  | 3  |
| Dryopteridaceae | Lastreopsis   | boivinii          | 0 | 0 | 0 | 0 | 0 | 0 | 0 | 0 | 0 | 0 | 0 | 0 | 0 | 0 | 0 | 0 | 0 | 0 | 0 | 0 | 0 | 0 | 0 | 0 | 0 | 1 | 1  |    |
| Dryopteridaceae | Lastreopsis   | currorii          | 0 | 1 | 0 | 0 | 1 | 1 | 0 | 0 | 1 | 0 | 1 | 0 | 0 | 0 | 0 | 0 | 0 | 0 | 0 | 0 | 1 | 0 | 0 | 0 | 0 | 1 | 8  |    |





|                 |               |                  |   |   |   |   |   |   |   |   |   |   |   |   |   |   |   |   |   |   |   |   |   |   |   |   |   |   |    |    |
|-----------------|---------------|------------------|---|---|---|---|---|---|---|---|---|---|---|---|---|---|---|---|---|---|---|---|---|---|---|---|---|---|----|----|
| Dryopteridaceae | Tectaria      | lawrenceana      | 0 | 0 | 0 | 0 | 0 | 0 | 0 | 0 | 0 | 0 | 0 | 0 | 0 | 0 | 0 | 0 | 0 | 0 | 0 | 0 | 0 | 0 | 0 | 0 | 0 | 1 | 1  |    |
| Dryopteridaceae | Tectaria      | macrodonga       | 0 | 0 | 0 | 0 | 0 | 0 | 0 | 0 | 0 | 0 | 0 | 0 | 1 | 1 | 0 | 0 | 0 | 0 | 0 | 0 | 0 | 0 | 0 | 0 | 0 | 0 | 2  |    |
| Dryopteridaceae | Tectaria      | madagascarica    | 0 | 0 | 0 | 0 | 0 | 0 | 0 | 0 | 0 | 0 | 0 | 0 | 0 | 0 | 0 | 0 | 0 | 0 | 0 | 0 | 0 | 0 | 0 | 0 | 0 | 1 | 1  |    |
| Dryopteridaceae | Tectaria      | magnifica        | 0 | 0 | 0 | 0 | 0 | 0 | 0 | 0 | 0 | 0 | 0 | 0 | 1 | 0 | 0 | 0 | 0 | 0 | 0 | 0 | 0 | 0 | 0 | 0 | 0 | 1 | 2  |    |
| Dryopteridaceae | Tectaria      | puberula         | 0 | 0 | 0 | 0 | 0 | 0 | 0 | 0 | 0 | 0 | 0 | 0 | 0 | 0 | 0 | 0 | 0 | 0 | 0 | 0 | 0 | 0 | 0 | 0 | 0 | 1 | 1  |    |
| Dryopteridaceae | Triplophyllum | buchholzii       | 1 | 0 | 0 | 0 | 0 | 1 | 0 | 1 | 0 | 0 | 0 | 0 | 0 | 0 | 0 | 0 | 0 | 0 | 0 | 0 | 0 | 0 | 0 | 0 | 0 | 0 | 3  |    |
| Dryopteridaceae | Triplophyllum | dimidiatum       | 0 | 0 | 0 | 0 | 0 | 0 | 0 | 0 | 0 | 1 | 0 | 0 | 0 | 0 | 0 | 0 | 0 | 0 | 0 | 0 | 0 | 0 | 0 | 0 | 0 | 0 | 1  |    |
| Dryopteridaceae | Triplophyllum | fraternum        | 0 | 0 | 0 | 0 | 0 | 0 | 0 | 1 | 1 | 0 | 1 | 0 | 0 | 0 | 0 | 0 | 0 | 0 | 0 | 0 | 0 | 0 | 0 | 0 | 0 | 1 | 4  |    |
| Dryopteridaceae | Triplophyllum | gabonense        | 0 | 0 | 0 | 0 | 0 | 1 | 0 | 0 | 0 | 0 | 0 | 0 | 0 | 0 | 0 | 0 | 0 | 0 | 0 | 0 | 0 | 0 | 0 | 0 | 0 | 0 | 1  |    |
| Dryopteridaceae | Triplophyllum | jenseniae        | 1 | 1 | 0 | 0 | 0 | 1 | 0 | 1 | 1 | 0 | 0 | 0 | 1 | 0 | 1 | 0 | 0 | 0 | 0 | 0 | 0 | 0 | 0 | 0 | 0 | 0 | 7  |    |
| Dryopteridaceae | Triplophyllum | pentagonum       | 0 | 0 | 0 | 0 | 0 | 0 | 0 | 0 | 0 | 0 | 0 | 0 | 0 | 0 | 0 | 0 | 0 | 0 | 0 | 0 | 0 | 0 | 0 | 0 | 0 | 1 | 1  |    |
| Dryopteridaceae | Triplophyllum | pilosissimum     | 1 | 1 | 0 | 0 | 1 | 1 | 0 | 0 | 1 | 0 | 1 | 0 | 0 | 0 | 0 | 0 | 0 | 0 | 0 | 0 | 0 | 0 | 0 | 0 | 0 | 0 | 6  |    |
| Dryopteridaceae | Triplophyllum | principis        | 0 | 0 | 0 | 0 | 0 | 0 | 0 | 1 | 0 | 0 | 0 | 0 | 0 | 0 | 0 | 0 | 0 | 0 | 0 | 0 | 0 | 0 | 0 | 0 | 0 | 0 | 1  |    |
| Dryopteridaceae | Triplophyllum | protensum        | 1 | 1 | 0 | 0 | 1 | 1 | 1 | 1 | 1 | 0 | 1 | 0 | 1 | 0 | 1 | 0 | 0 | 0 | 0 | 1 | 0 | 0 | 0 | 0 | 0 | 0 | 11 |    |
| Dryopteridaceae | Triplophyllum | securidiforme    | 0 | 0 | 0 | 0 | 1 | 1 | 1 | 1 | 1 | 0 | 1 | 0 | 0 | 0 | 0 | 0 | 0 | 0 | 0 | 1 | 0 | 0 | 0 | 0 | 0 | 0 | 7  |    |
| Dryopteridaceae | Triplophyllum | speciosum        | 0 | 0 | 0 | 0 | 0 | 1 | 0 | 0 | 0 | 0 | 0 | 0 | 0 | 0 | 0 | 0 | 0 | 0 | 0 | 0 | 0 | 0 | 0 | 0 | 0 | 1 | 2  |    |
| Dryopteridaceae | Triplophyllum | troupinii        | 0 | 1 | 0 | 0 | 0 | 1 | 0 | 0 | 0 | 0 | 1 | 0 | 0 | 0 | 0 | 0 | 0 | 0 | 0 | 0 | 0 | 0 | 0 | 0 | 0 | 0 | 4  |    |
| Dryopteridaceae | Triplophyllum | varians          | 0 | 0 | 0 | 0 | 1 | 1 | 0 | 0 | 0 | 0 | 1 | 0 | 0 | 0 | 0 | 0 | 0 | 0 | 1 | 0 | 0 | 0 | 0 | 0 | 0 | 0 | 4  |    |
| Dryopteridaceae | Triplophyllum | vogelii          | 0 | 0 | 0 | 0 | 0 | 1 | 0 | 0 | 1 | 0 | 1 | 0 | 0 | 0 | 0 | 0 | 0 | 0 | 0 | 0 | 0 | 0 | 0 | 0 | 0 | 0 | 4  |    |
| Dryopteridaceae | Woodsia       | angolensis       | 0 | 0 | 0 | 0 | 0 | 0 | 0 | 0 | 0 | 0 | 1 | 0 | 0 | 0 | 0 | 1 | 0 | 0 | 0 | 0 | 0 | 0 | 0 | 0 | 0 | 0 | 2  |    |
| Dryopteridaceae | Woodsia       | montevidensis    | 0 | 0 | 0 | 0 | 0 | 0 | 0 | 0 | 0 | 0 | 0 | 0 | 0 | 0 | 0 | 1 | 0 | 0 | 0 | 0 | 0 | 0 | 0 | 0 | 0 | 1 | 2  |    |
| Equisetaceae    | Equisetum     | ramosissimum     | 0 | 0 | 0 | 0 | 0 | 0 | 0 | 0 | 0 | 0 | 1 | 1 | 1 | 1 | 1 | 1 | 1 | 0 | 0 | 1 | 0 | 0 | 0 | 0 | 0 | 1 | 10 |    |
| Gleicheniaceae  | Dicranopteris | linearis         | 1 | 1 | 0 | 1 | 1 | 1 | 1 | 1 | 1 | 1 | 0 | 1 | 1 | 1 | 1 | 1 | 1 | 0 | 0 | 0 | 1 | 0 | 0 | 0 | 0 | 0 | 1  | 18 |
| Gleicheniaceae  | Gleichenia    | elongata         | 0 | 0 | 0 | 0 | 0 | 0 | 0 | 0 | 0 | 0 | 0 | 1 | 1 | 1 | 0 | 0 | 0 | 0 | 0 | 0 | 0 | 0 | 0 | 0 | 0 | 0 | 3  |    |
| Gleicheniaceae  | Gleichenia    | madagascariensis | 0 | 0 | 0 | 0 | 0 | 0 | 0 | 0 | 0 | 0 | 0 | 0 | 0 | 0 | 0 | 0 | 0 | 0 | 0 | 0 | 0 | 0 | 0 | 0 | 0 | 1 | 1  |    |
| Gleicheniaceae  | Gleichenia    | polypodioides    | 0 | 0 | 0 | 0 | 0 | 0 | 0 | 0 | 0 | 0 | 0 | 0 | 0 | 1 | 1 | 1 | 1 | 1 | 0 | 1 | 0 | 0 | 0 | 0 | 0 | 1 | 7  |    |
| Gleicheniaceae  | Gleichenia    | umbraculifera    | 0 | 0 | 0 | 0 | 0 | 0 | 0 | 0 | 0 | 0 | 0 | 0 | 0 | 1 | 1 | 1 | 0 | 0 | 0 | 0 | 0 | 0 | 0 | 0 | 0 | 1 | 4  |    |
| Grammitaceae    | Ctenopteris   | alboglandulosa   | 0 | 0 | 0 | 0 | 0 | 0 | 0 | 0 | 0 | 0 | 0 | 0 | 0 | 0 | 0 | 0 | 0 | 0 | 0 | 0 | 0 | 0 | 0 | 0 | 0 | 1 | 1  |    |
| Grammitaceae    | Ctenopteris   | deltodon         | 0 | 0 | 0 | 0 | 0 | 0 | 0 | 0 | 0 | 0 | 0 | 0 | 0 | 0 | 0 | 0 | 0 | 0 | 0 | 0 | 0 | 0 | 0 | 0 | 0 | 1 | 1  |    |
| Grammitaceae    | Ctenopteris   | devoluta         | 0 | 0 | 0 | 0 | 0 | 0 | 0 | 0 | 0 | 0 | 0 | 0 | 0 | 0 | 0 | 0 | 0 | 0 | 0 | 0 | 0 | 0 | 0 | 0 | 0 | 1 | 1  |    |
| Grammitaceae    | Ctenopteris   | excaudata        | 0 | 0 | 0 | 0 | 0 | 0 | 0 | 0 | 0 | 0 | 0 | 0 | 0 | 0 | 0 | 0 | 0 | 0 | 0 | 0 | 0 | 0 | 0 | 0 | 0 | 1 | 1  |    |
| Grammitaceae    | Ctenopteris   | forsythiana      | 0 | 0 | 0 | 0 | 0 | 0 | 0 | 0 | 0 | 0 | 0 | 0 | 0 | 0 | 0 | 0 | 0 | 0 | 0 | 0 | 0 | 0 | 0 | 0 | 0 | 1 | 1  |    |
| Grammitaceae    | Ctenopteris   | humbertii        | 0 | 0 | 0 | 0 | 0 | 0 | 0 | 0 | 0 | 0 | 0 | 0 | 0 | 0 | 0 | 0 | 0 | 0 | 0 | 0 | 0 | 0 | 0 | 0 | 0 | 1 | 1  |    |
| Grammitaceae    | Ctenopteris   | torulosa         | 0 | 0 | 0 | 0 | 0 | 0 | 0 | 0 | 0 | 0 | 0 | 0 | 0 | 0 | 0 | 0 | 0 | 0 | 0 | 0 | 0 | 0 | 0 | 0 | 0 | 1 | 1  |    |
| Grammitaceae    | Grammitis     | barbatula        | 0 | 0 | 0 | 0 | 0 | 0 | 0 | 0 | 0 | 0 | 0 | 0 | 1 | 0 | 0 | 0 | 0 | 0 | 0 | 0 | 0 | 0 | 0 | 0 | 0 | 1 | 2  |    |
| Grammitaceae    | Grammitis     | cryptophlebia    | 0 | 0 | 0 | 0 | 0 | 0 | 0 | 0 | 0 | 0 | 0 | 0 | 0 | 0 | 0 | 0 | 0 | 0 | 0 | 0 | 0 | 0 | 0 | 0 | 0 | 1 | 1  |    |
| Grammitaceae    | Grammitis     | ebenina          | 0 | 0 | 0 | 0 | 0 | 1 | 0 | 0 | 0 | 0 | 0 | 0 | 0 | 0 | 0 | 0 | 0 | 0 | 0 | 1 | 0 | 0 | 0 | 0 | 0 | 0 | 2  |    |
| Grammitaceae    | Grammitis     | holophlebia      | 0 | 0 | 0 | 0 | 0 | 0 | 0 | 0 | 0 | 0 | 0 | 0 | 0 | 0 | 0 | 0 | 0 | 0 | 0 | 0 | 0 | 0 | 0 | 0 | 0 | 1 | 1  |    |
| Grammitaceae    | Grammitis     | kyimbilensis     | 0 | 0 | 0 | 0 | 0 | 0 | 0 | 0 | 0 | 0 | 0 | 0 | 1 | 0 | 0 | 0 | 0 | 0 | 0 | 0 | 0 | 0 | 0 | 0 | 0 | 1 | 2  |    |
| Grammitaceae    | Grammitis     | magellanica      | 0 | 0 | 0 | 0 | 0 | 0 | 0 | 0 | 0 | 0 | 0 | 0 | 0 | 0 | 0 | 0 | 0 | 0 | 0 | 0 | 0 | 0 | 0 | 1 | 1 | 1 | 0  | 3  |











|               |              |                  |   |   |   |   |   |   |   |   |   |   |   |   |   |   |   |   |   |   |   |   |   |   |   |   |   |   |   |    |   |
|---------------|--------------|------------------|---|---|---|---|---|---|---|---|---|---|---|---|---|---|---|---|---|---|---|---|---|---|---|---|---|---|---|----|---|
| Lycopodiaceae | Huperzia     | phlegmaria       | 0 | 0 | 0 | 0 | 1 | 0 | 1 | 1 | 1 | 0 | 1 | 0 | 0 | 1 | 1 | 1 | 0 | 0 | 0 | 0 | 0 | 0 | 0 | 0 | 0 | 0 | 1 | 9  |   |
| Lycopodiaceae | Huperzia     | perreriana       | 0 | 0 | 0 | 0 | 0 | 0 | 0 | 0 | 0 | 0 | 0 | 0 | 0 | 0 | 0 | 0 | 0 | 0 | 0 | 0 | 0 | 0 | 0 | 0 | 0 | 0 | 1 | 1  |   |
| Lycopodiaceae | Huperzia     | pichiana         | 0 | 0 | 0 | 0 | 0 | 0 | 0 | 0 | 0 | 0 | 0 | 0 | 0 | 0 | 0 | 0 | 0 | 0 | 0 | 0 | 0 | 0 | 0 | 0 | 0 | 0 | 1 | 1  |   |
| Lycopodiaceae | Huperzia     | rubrica          | 0 | 0 | 0 | 0 | 0 | 0 | 0 | 0 | 0 | 0 | 0 | 0 | 0 | 0 | 0 | 0 | 0 | 0 | 0 | 0 | 0 | 0 | 0 | 0 | 0 | 0 | 1 | 1  |   |
| Lycopodiaceae | Huperzia     | saururus         | 0 | 0 | 0 | 0 | 1 | 0 | 0 | 0 | 0 | 0 | 0 | 0 | 1 | 1 | 1 | 1 | 1 | 1 | 1 | 0 | 0 | 1 | 0 | 1 | 0 | 0 | 1 | 11 |   |
| Lycopodiaceae | Huperzia     | squarrosa        | 0 | 0 | 0 | 0 | 0 | 0 | 0 | 0 | 0 | 0 | 0 | 0 | 0 | 0 | 0 | 0 | 0 | 0 | 0 | 0 | 0 | 0 | 0 | 0 | 0 | 0 | 1 | 1  |   |
| Lycopodiaceae | Huperzia     | staudii          | 1 | 0 | 0 | 0 | 0 | 0 | 0 | 0 | 0 | 0 | 0 | 0 | 0 | 0 | 0 | 0 | 0 | 0 | 0 | 0 | 0 | 0 | 0 | 0 | 0 | 0 | 0 | 1  |   |
| Lycopodiaceae | Huperzia     | stricta          | 0 | 0 | 0 | 0 | 0 | 0 | 0 | 0 | 0 | 0 | 0 | 0 | 0 | 0 | 0 | 0 | 0 | 0 | 0 | 0 | 0 | 0 | 0 | 0 | 0 | 0 | 1 | 1  |   |
| Lycopodiaceae | Huperzia     | suberecta        | 0 | 0 | 0 | 0 | 0 | 0 | 0 | 0 | 0 | 0 | 0 | 0 | 1 | 0 | 0 | 0 | 0 | 0 | 0 | 0 | 0 | 0 | 0 | 0 | 0 | 0 | 1 | 2  |   |
| Lycopodiaceae | Huperzia     | trigona          | 0 | 0 | 0 | 0 | 0 | 0 | 0 | 0 | 0 | 0 | 0 | 0 | 0 | 0 | 0 | 0 | 0 | 0 | 0 | 0 | 0 | 0 | 0 | 0 | 0 | 0 | 1 | 1  |   |
| Lycopodiaceae | Huperzia     | verticillata     | 0 | 0 | 0 | 0 | 1 | 0 | 1 | 0 | 1 | 0 | 0 | 0 | 1 | 1 | 1 | 1 | 1 | 0 | 0 | 0 | 0 | 0 | 0 | 0 | 0 | 0 | 1 | 8  |   |
| Lycopodiaceae | Huperzia     | warneckei        | 1 | 0 | 0 | 0 | 0 | 0 | 1 | 0 | 0 | 0 | 0 | 0 | 1 | 1 | 1 | 0 | 0 | 0 | 0 | 0 | 0 | 0 | 0 | 0 | 0 | 0 | 0 | 5  |   |
| Lycopodiaceae | Huperzia     | xiphophylla      | 0 | 0 | 0 | 0 | 0 | 0 | 0 | 0 | 0 | 0 | 0 | 0 | 0 | 0 | 0 | 0 | 0 | 0 | 0 | 0 | 0 | 0 | 0 | 0 | 0 | 0 | 1 | 1  |   |
| Lycopodiaceae | Lycopodiella | caroliniana      | 1 | 0 | 0 | 0 | 0 | 1 | 0 | 0 | 0 | 0 | 1 | 0 | 1 | 1 | 1 | 1 | 1 | 1 | 0 | 1 | 0 | 0 | 0 | 0 | 0 | 0 | 1 | 11 |   |
| Lycopodiaceae | Lycopodiella | cernua           | 0 | 0 | 0 | 1 | 1 | 1 | 1 | 1 | 1 | 1 | 0 | 1 | 1 | 1 | 1 | 1 | 1 | 1 | 0 | 1 | 1 | 1 | 0 | 0 | 0 | 1 | 1 | 21 |   |
| Lycopodiaceae | Lycopodium   | aberdaricum      | 0 | 0 | 0 | 0 | 0 | 0 | 0 | 0 | 0 | 0 | 0 | 0 | 1 | 0 | 0 | 0 | 0 | 0 | 0 | 0 | 0 | 0 | 0 | 0 | 0 | 0 | 0 | 1  |   |
| Lycopodiaceae | Lycopodium   | axillare         | 0 | 0 | 0 | 0 | 0 | 0 | 0 | 0 | 0 | 0 | 0 | 0 | 0 | 0 | 0 | 0 | 0 | 0 | 0 | 0 | 1 | 0 | 0 | 0 | 0 | 0 | 0 | 1  |   |
| Lycopodiaceae | Lycopodium   | complanatum      | 0 | 0 | 0 | 0 | 0 | 0 | 0 | 0 | 0 | 0 | 0 | 0 | 0 | 0 | 0 | 0 | 1 | 1 | 0 | 0 | 0 | 0 | 0 | 0 | 0 | 0 | 1 | 3  |   |
| Lycopodiaceae | Lycopodium   | clavatum         | 0 | 0 | 0 | 0 | 0 | 0 | 1 | 0 | 1 | 0 | 0 | 0 | 1 | 1 | 1 | 1 | 1 | 1 | 1 | 0 | 1 | 0 | 0 | 0 | 0 | 0 | 1 | 12 |   |
| Lycopodiaceae | Lycopodium   | diaphanum        | 0 | 0 | 0 | 0 | 0 | 0 | 0 | 0 | 0 | 0 | 0 | 0 | 0 | 0 | 0 | 0 | 0 | 0 | 0 | 0 | 0 | 0 | 0 | 0 | 1 | 1 | 0 | 2  |   |
| Lycopodiaceae | Lycopodium   | magellanicum     | 0 | 0 | 0 | 0 | 0 | 0 | 0 | 0 | 0 | 0 | 0 | 0 | 0 | 0 | 0 | 0 | 0 | 0 | 0 | 0 | 0 | 0 | 0 | 0 | 1 | 1 | 1 | 0  | 3 |
| Marattiaceae  | Angiopteris  | madagascariensis | 0 | 0 | 0 | 0 | 0 | 0 | 0 | 0 | 0 | 0 | 0 | 0 | 0 | 0 | 0 | 0 | 0 | 0 | 0 | 0 | 0 | 0 | 0 | 0 | 0 | 0 | 1 | 1  |   |
| Marattiaceae  | Marattia     | fraxinea         | 1 | 1 | 0 | 1 | 1 | 1 | 1 | 1 | 1 | 0 | 1 | 1 | 1 | 1 | 1 | 1 | 1 | 0 | 0 | 1 | 0 | 0 | 0 | 0 | 0 | 0 | 1 | 19 |   |
| Marattiaceae  | Marattia     | obesa            | 1 | 0 | 0 | 0 | 0 | 0 | 0 | 0 | 0 | 0 | 0 | 0 | 0 | 0 | 0 | 0 | 0 | 0 | 0 | 0 | 0 | 0 | 0 | 0 | 0 | 0 | 1 | 2  |   |
| Marattiaceae  | Marattia     | purpurascens     | 0 | 0 | 0 | 0 | 0 | 0 | 0 | 0 | 0 | 0 | 0 | 0 | 0 | 0 | 0 | 0 | 0 | 0 | 0 | 0 | 0 | 0 | 0 | 0 | 1 | 0 | 0 | 0  | 1 |
| Marsileaceae  | Marsilea     | aegyptiaca       | 0 | 0 | 0 | 0 | 0 | 0 | 0 | 0 | 0 | 0 | 0 | 1 | 0 | 1 | 0 | 0 | 1 | 0 | 0 | 1 | 0 | 0 | 0 | 0 | 0 | 0 | 1 | 5  |   |
| Marsileaceae  | Marsilea     | apposita         | 0 | 0 | 0 | 0 | 0 | 0 | 0 | 0 | 0 | 0 | 0 | 0 | 0 | 0 | 0 | 1 | 0 | 0 | 1 | 0 | 0 | 0 | 0 | 0 | 0 | 0 | 0 | 2  |   |
| Marsileaceae  | Marsilea     | botryocarpa      | 0 | 0 | 0 | 0 | 0 | 0 | 0 | 0 | 0 | 0 | 0 | 0 | 1 | 0 | 0 | 0 | 0 | 0 | 0 | 0 | 0 | 0 | 0 | 0 | 0 | 0 | 0 | 1  |   |
| Marsileaceae  | Marsilea     | burchellii       | 0 | 0 | 0 | 0 | 0 | 0 | 0 | 0 | 0 | 0 | 0 | 0 | 0 | 0 | 0 | 0 | 1 | 1 | 1 | 0 | 0 | 0 | 0 | 0 | 0 | 0 | 0 | 3  |   |
| Marsileaceae  | Marsilea     | capensis         | 0 | 0 | 0 | 0 | 0 | 0 | 0 | 0 | 0 | 0 | 0 | 0 | 0 | 0 | 0 | 1 | 1 | 1 | 0 | 0 | 0 | 0 | 0 | 0 | 0 | 0 | 0 | 3  |   |
| Marsileaceae  | Marsilea     | coromandeliana   | 0 | 0 | 0 | 0 | 0 | 0 | 0 | 0 | 0 | 0 | 0 | 0 | 1 | 1 | 1 | 0 | 0 | 0 | 1 | 1 | 0 | 0 | 0 | 0 | 0 | 0 | 1 | 6  |   |
| Marsileaceae  | Marsilea     | distorta         | 0 | 0 | 0 | 0 | 0 | 0 | 0 | 0 | 0 | 0 | 0 | 0 | 1 | 1 | 0 | 0 | 0 | 0 | 1 | 0 | 0 | 0 | 0 | 0 | 0 | 0 | 0 | 3  |   |
| Marsileaceae  | Marsilea     | ephippiocarpa    | 0 | 0 | 0 | 0 | 0 | 0 | 0 | 0 | 0 | 0 | 0 | 0 | 0 | 0 | 1 | 1 | 0 | 0 | 1 | 1 | 0 | 0 | 0 | 0 | 0 | 0 | 0 | 4  |   |
| Marsileaceae  | Marsilea     | fadeniana        | 0 | 0 | 0 | 0 | 0 | 0 | 0 | 0 | 0 | 0 | 0 | 0 | 1 | 0 | 0 | 0 | 0 | 0 | 0 | 0 | 0 | 0 | 0 | 0 | 0 | 0 | 0 | 1  |   |
| Marsileaceae  | Marsilea     | fenestrata       | 0 | 0 | 0 | 0 | 0 | 0 | 0 | 0 | 0 | 0 | 0 | 0 | 0 | 0 | 0 | 1 | 0 | 0 | 0 | 0 | 0 | 0 | 0 | 0 | 0 | 0 | 0 | 1  |   |
| Marsileaceae  | Marsilea     | farinosa         | 0 | 0 | 0 | 0 | 0 | 0 | 0 | 0 | 0 | 0 | 0 | 1 | 0 | 1 | 1 | 1 | 1 | 0 | 0 | 1 | 1 | 0 | 0 | 0 | 0 | 0 | 0 | 7  |   |
| Marsileaceae  | Marsilea     | gibba            | 0 | 0 | 0 | 0 | 0 | 0 | 0 | 0 | 0 | 0 | 0 | 1 | 1 | 1 | 0 | 0 | 0 | 0 | 0 | 0 | 0 | 0 | 0 | 0 | 0 | 0 | 0 | 3  |   |
| Marsileaceae  | Marsilea     | macrocarpa       | 0 | 0 | 0 | 0 | 0 | 0 | 0 | 0 | 0 | 0 | 0 | 1 | 1 | 1 | 0 | 1 | 0 | 1 | 1 | 1 | 0 | 0 | 0 | 0 | 0 | 0 | 0 | 7  |   |
| Marsileaceae  | Marsilea     | megalomanica     | 0 | 0 | 0 | 0 | 0 | 0 | 0 | 0 | 0 | 0 | 0 | 0 | 0 | 0 | 1 | 0 | 0 | 0 | 0 | 0 | 0 | 0 | 0 | 0 | 0 | 0 | 0 | 1  |   |
| Marsileaceae  | Marsilea     | minuta           | 1 | 1 | 0 | 0 | 0 | 0 | 0 | 0 | 0 | 0 | 1 | 0 | 1 | 1 | 1 | 1 | 1 | 0 | 0 | 0 | 1 | 0 | 0 | 0 | 0 | 0 | 1 | 10 |   |







|               |                      |                         |   |   |   |   |   |   |   |   |   |   |   |   |   |   |   |   |   |   |   |   |   |   |   |   |   |   |   |   |   |   |   |   |    |    |    |
|---------------|----------------------|-------------------------|---|---|---|---|---|---|---|---|---|---|---|---|---|---|---|---|---|---|---|---|---|---|---|---|---|---|---|---|---|---|---|---|----|----|----|
| Polypodiaceae | <i>Pyrrosia</i>      | <i>africana</i>         | 0 | 0 | 0 | 0 | 0 | 0 | 0 | 0 | 0 | 0 | 0 | 0 | 0 | 0 | 0 | 0 | 0 | 1 | 0 | 0 | 0 | 0 | 0 | 0 | 0 | 0 | 0 | 0 | 0 | 0 | 0 | 0 | 0  | 1  |    |
| Polypodiaceae | <i>Pyrrosia</i>      | <i>lanceolata</i>       | 0 | 0 | 0 | 0 | 1 | 0 | 0 | 1 | 0 | 0 | 0 | 0 | 1 | 1 | 1 | 0 | 0 | 0 | 0 | 0 | 0 | 0 | 0 | 0 | 0 | 0 | 0 | 0 | 0 | 0 | 0 | 0 | 1  | 6  |    |
| Polypodiaceae | <i>Pyrrosia</i>      | <i>niphoboloides</i>    | 0 | 0 | 0 | 0 | 0 | 0 | 0 | 0 | 0 | 0 | 0 | 0 | 0 | 0 | 0 | 0 | 0 | 0 | 0 | 0 | 0 | 0 | 0 | 0 | 0 | 0 | 0 | 0 | 0 | 0 | 0 | 0 | 1  | 1  |    |
| Polypodiaceae | <i>Pyrrosia</i>      | <i>rhodesiana</i>       | 0 | 0 | 0 | 0 | 0 | 0 | 0 | 0 | 0 | 0 | 0 | 0 | 1 | 0 | 1 | 1 | 0 | 0 | 0 | 0 | 0 | 0 | 0 | 0 | 0 | 0 | 0 | 0 | 0 | 0 | 0 | 0 | 1  | 4  |    |
| Polypodiaceae | <i>Pyrrosia</i>      | <i>schimperiana</i>     | 1 | 0 | 1 | 1 | 1 | 0 | 1 | 1 | 1 | 0 | 0 | 0 | 1 | 1 | 1 | 1 | 1 | 0 | 0 | 0 | 1 | 0 | 0 | 0 | 0 | 0 | 0 | 0 | 0 | 0 | 0 | 0 | 0  | 14 |    |
| Polypodiaceae | <i>Pyrrosia</i>      | <i>stolzii</i>          | 0 | 0 | 0 | 0 | 0 | 0 | 0 | 0 | 0 | 0 | 0 | 0 | 0 | 0 | 1 | 0 | 0 | 0 | 0 | 0 | 0 | 0 | 0 | 0 | 0 | 0 | 0 | 0 | 0 | 0 | 0 | 0 | 0  | 1  |    |
| Psilotaceae   | <i>Psilotum</i>      | <i>nudum</i>            | 0 | 1 | 0 | 0 | 0 | 1 | 1 | 0 | 1 | 1 | 1 | 0 | 0 | 1 | 1 | 0 | 1 | 1 | 0 | 0 | 0 | 1 | 0 | 1 | 0 | 0 | 0 | 0 | 1 | 1 | 0 | 0 | 1  | 14 |    |
| Pteridaceae   | <i>Acrostichum</i>   | <i>aureum</i>           | 1 | 1 | 0 | 0 | 1 | 0 | 1 | 1 | 1 | 0 | 1 | 0 | 0 | 0 | 1 | 1 | 0 | 1 | 0 | 0 | 0 | 1 | 0 | 0 | 0 | 0 | 0 | 0 | 0 | 0 | 0 | 0 | 1  | 12 |    |
| Pteridaceae   | <i>Acrostichum</i>   | <i>speciosum</i>        | 0 | 0 | 0 | 0 | 0 | 0 | 0 | 0 | 0 | 0 | 0 | 0 | 0 | 0 | 0 | 0 | 0 | 0 | 0 | 0 | 0 | 0 | 0 | 0 | 0 | 0 | 0 | 0 | 0 | 0 | 0 | 0 | 1  | 1  |    |
| Pteridaceae   | <i>Actiniopteris</i> | <i>australis</i>        | 0 | 0 | 0 | 0 | 0 | 0 | 0 | 0 | 0 | 0 | 0 | 0 | 0 | 0 | 0 | 0 | 0 | 0 | 0 | 0 | 0 | 0 | 0 | 0 | 0 | 0 | 0 | 0 | 0 | 0 | 0 | 0 | 1  | 1  |    |
| Pteridaceae   | <i>Actiniopteris</i> | <i>dimorpha</i>         | 0 | 0 | 0 | 0 | 0 | 0 | 0 | 0 | 0 | 0 | 0 | 0 | 1 | 1 | 1 | 1 | 1 | 0 | 0 | 0 | 0 | 0 | 0 | 0 | 0 | 0 | 0 | 0 | 0 | 0 | 0 | 0 | 1  | 7  |    |
| Pteridaceae   | <i>Actiniopteris</i> | <i>pauciloba</i>        | 0 | 0 | 0 | 0 | 0 | 0 | 0 | 0 | 0 | 0 | 0 | 0 | 0 | 0 | 1 | 0 | 0 | 0 | 0 | 0 | 1 | 0 | 0 | 0 | 0 | 0 | 0 | 0 | 0 | 0 | 0 | 0 | 0  | 2  |    |
| Pteridaceae   | <i>Actiniopteris</i> | <i>radiata</i>          | 0 | 0 | 0 | 0 | 0 | 0 | 0 | 0 | 0 | 0 | 0 | 1 | 1 | 1 | 1 | 1 | 1 | 0 | 0 | 1 | 1 | 0 | 0 | 0 | 0 | 0 | 0 | 0 | 0 | 0 | 1 | 1 | 11 |    |    |
| Pteridaceae   | <i>Actiniopteris</i> | <i>semiflabellata</i>   | 0 | 0 | 0 | 0 | 0 | 0 | 0 | 0 | 0 | 0 | 0 | 1 | 1 | 1 | 1 | 1 | 0 | 0 | 0 | 0 | 0 | 0 | 0 | 0 | 0 | 0 | 0 | 0 | 0 | 0 | 0 | 0 | 1  | 6  |    |
| Pteridaceae   | <i>Adiantopsis</i>   | <i>linearis</i>         | 0 | 0 | 0 | 0 | 0 | 0 | 0 | 0 | 0 | 0 | 0 | 0 | 0 | 0 | 0 | 0 | 0 | 0 | 0 | 0 | 0 | 0 | 0 | 0 | 0 | 0 | 0 | 0 | 0 | 0 | 0 | 0 | 1  | 1  |    |
| Pteridaceae   | <i>Adiantopsis</i>   | <i>madagascariensis</i> | 0 | 0 | 0 | 0 | 0 | 0 | 0 | 0 | 0 | 0 | 0 | 0 | 0 | 0 | 0 | 0 | 0 | 0 | 0 | 0 | 0 | 0 | 0 | 0 | 0 | 0 | 0 | 0 | 0 | 0 | 0 | 0 | 0  | 1  | 1  |
| Pteridaceae   | <i>Adiantum</i>      | <i>aethiopicum</i>      | 0 | 0 | 0 | 0 | 0 | 0 | 0 | 0 | 0 | 0 | 0 | 0 | 0 | 0 | 0 | 0 | 0 | 1 | 1 | 0 | 0 | 0 | 0 | 0 | 0 | 0 | 0 | 0 | 0 | 0 | 0 | 0 | 0  | 2  |    |
| Pteridaceae   | <i>Adiantum</i>      | <i>capillus-veneris</i> | 0 | 0 | 0 | 0 | 0 | 0 | 0 | 0 | 0 | 0 | 0 | 1 | 1 | 1 | 1 | 1 | 1 | 1 | 1 | 1 | 1 | 1 | 0 | 0 | 0 | 0 | 0 | 0 | 0 | 0 | 1 | 1 | 13 |    |    |
| Pteridaceae   | <i>Adiantum</i>      | <i>comorense</i>        | 0 | 0 | 0 | 0 | 0 | 0 | 0 | 0 | 0 | 0 | 0 | 0 | 1 | 1 | 1 | 0 | 0 | 0 | 0 | 0 | 0 | 0 | 0 | 0 | 0 | 0 | 0 | 0 | 0 | 0 | 0 | 0 | 0  | 3  |    |
| Pteridaceae   | <i>Adiantum</i>      | <i>confine</i>          | 1 | 1 | 1 | 0 | 0 | 0 | 0 | 0 | 0 | 0 | 0 | 0 | 0 | 1 | 0 | 0 | 0 | 0 | 0 | 0 | 0 | 0 | 0 | 0 | 0 | 0 | 0 | 0 | 0 | 0 | 0 | 0 | 0  | 4  |    |
| Pteridaceae   | <i>Adiantum</i>      | <i>flabellum</i>        | 0 | 0 | 0 | 0 | 0 | 0 | 0 | 0 | 0 | 0 | 0 | 0 | 0 | 0 | 0 | 0 | 0 | 0 | 0 | 0 | 0 | 0 | 0 | 0 | 0 | 0 | 0 | 0 | 0 | 0 | 0 | 0 | 0  | 1  | 1  |
| Pteridaceae   | <i>Adiantum</i>      | <i>hirsutum</i>         | 0 | 0 | 0 | 0 | 0 | 0 | 0 | 0 | 0 | 0 | 0 | 0 | 0 | 0 | 0 | 0 | 0 | 0 | 0 | 0 | 0 | 0 | 0 | 0 | 0 | 0 | 0 | 0 | 0 | 0 | 0 | 0 | 0  | 1  | 1  |
| Pteridaceae   | <i>Adiantum</i>      | <i>hispidulum</i>       | 0 | 0 | 0 | 0 | 0 | 0 | 0 | 0 | 0 | 0 | 0 | 0 | 0 | 0 | 0 | 0 | 0 | 0 | 0 | 0 | 0 | 0 | 0 | 0 | 0 | 0 | 0 | 0 | 0 | 0 | 0 | 0 | 0  | 1  | 5  |
| Pteridaceae   | <i>Adiantum</i>      | <i>incisum</i>          | 1 | 1 | 0 | 0 | 0 | 0 | 0 | 0 | 0 | 0 | 0 | 1 | 1 | 1 | 1 | 1 | 1 | 0 | 0 | 1 | 1 | 0 | 0 | 0 | 0 | 0 | 0 | 0 | 0 | 0 | 0 | 1 | 1  | 12 |    |
| Pteridaceae   | <i>Adiantum</i>      | <i>madagascariense</i>  | 0 | 0 | 0 | 0 | 0 | 0 | 0 | 0 | 0 | 0 | 0 | 0 | 0 | 0 | 0 | 0 | 0 | 0 | 0 | 0 | 0 | 0 | 0 | 0 | 0 | 0 | 0 | 0 | 0 | 0 | 0 | 0 | 0  | 1  | 1  |
| Pteridaceae   | <i>Adiantum</i>      | <i>mendoncae</i>        | 0 | 0 | 0 | 0 | 0 | 0 | 0 | 0 | 0 | 0 | 0 | 0 | 0 | 0 | 0 | 0 | 1 | 0 | 0 | 0 | 0 | 0 | 0 | 0 | 0 | 0 | 0 | 0 | 0 | 0 | 0 | 0 | 0  | 0  | 1  |
| Pteridaceae   | <i>Adiantum</i>      | <i>mettenii</i>         | 0 | 1 | 0 | 0 | 0 | 0 | 1 | 0 | 0 | 1 | 0 | 0 | 0 | 0 | 0 | 1 | 0 | 0 | 0 | 0 | 0 | 1 | 0 | 0 | 0 | 0 | 0 | 0 | 0 | 0 | 0 | 0 | 0  | 1  | 6  |
| Pteridaceae   | <i>Adiantum</i>      | <i>phanerophlebium</i>  | 0 | 0 | 0 | 0 | 0 | 0 | 0 | 0 | 0 | 0 | 0 | 0 | 0 | 0 | 0 | 0 | 0 | 0 | 0 | 0 | 0 | 0 | 0 | 0 | 0 | 0 | 0 | 0 | 0 | 0 | 0 | 0 | 0  | 1  | 1  |
| Pteridaceae   | <i>Adiantum</i>      | <i>philippense</i>      | 1 | 1 | 0 | 0 | 1 | 0 | 1 | 0 | 1 | 0 | 0 | 1 | 1 | 0 | 0 | 1 | 1 | 1 | 0 | 0 | 1 | 1 | 0 | 0 | 0 | 0 | 0 | 0 | 0 | 0 | 0 | 1 | 1  | 14 |    |
| Pteridaceae   | <i>Adiantum</i>      | <i>poiretii</i>         | 0 | 0 | 0 | 1 | 1 | 0 | 0 | 0 | 1 | 0 | 0 | 1 | 1 | 0 | 1 | 1 | 1 | 1 | 1 | 1 | 1 | 0 | 0 | 0 | 1 | 1 | 0 | 0 | 0 | 0 | 0 | 0 | 0  | 1  | 15 |
| Pteridaceae   | <i>Adiantum</i>      | <i>reniforme</i>        | 0 | 0 | 0 | 0 | 0 | 0 | 0 | 0 | 0 | 0 | 0 | 0 | 0 | 1 | 0 | 0 | 0 | 0 | 0 | 0 | 0 | 0 | 0 | 0 | 0 | 0 | 0 | 0 | 0 | 0 | 0 | 0 | 0  | 1  | 2  |
| Pteridaceae   | <i>Adiantum</i>      | <i>schweinfurthii</i>   | 1 | 0 | 1 | 0 | 0 | 0 | 0 | 0 | 0 | 0 | 0 | 0 | 0 | 0 | 0 | 0 | 0 | 0 | 0 | 0 | 0 | 1 | 0 | 0 | 0 | 0 | 0 | 0 | 0 | 0 | 0 | 0 | 0  | 3  |    |
| Pteridaceae   | <i>Adiantum</i>      | <i>stolzii</i>          | 0 | 0 | 0 | 0 | 0 | 0 | 0 | 0 | 0 | 0 | 0 | 0 | 0 | 0 | 0 | 1 | 0 | 0 | 0 | 0 | 0 | 0 | 0 | 0 | 0 | 0 | 0 | 0 | 0 | 0 | 0 | 0 | 0  | 0  | 1  |
| Pteridaceae   | <i>Adiantum</i>      | <i>vogelii</i>          | 1 | 1 | 1 | 0 | 1 | 1 | 0 | 1 | 1 | 0 | 1 | 0 | 0 | 0 | 0 | 0 | 0 | 0 | 0 | 0 | 0 | 1 | 0 | 0 | 0 | 0 | 0 | 0 | 0 | 0 | 0 | 0 | 0  | 0  | 9  |
| Pteridaceae   | <i>Afropteris</i>    | <i>repens</i>           | 0 | 0 | 0 | 0 | 0 | 1 | 0 | 0 | 0 | 0 | 1 | 0 | 0 | 0 | 0 | 0 | 0 | 0 | 0 | 0 | 0 | 0 | 0 | 0 | 0 | 0 | 0 | 0 | 0 | 0 | 0 | 0 | 0  | 0  | 2  |
| Pteridaceae   | <i>Anogramma</i>     | <i>leptophylla</i>      | 0 | 0 | 0 | 0 | 1 | 0 | 0 | 0 | 1 | 0 | 0 | 1 | 1 | 1 | 1 | 1 | 1 | 0 | 0 | 0 | 1 | 0 | 0 | 0 | 0 | 0 | 0 | 0 | 0 | 0 | 0 | 1 | 1  | 12 |    |
| Pteridaceae   | <i>Ceratopteris</i>  | <i>cornuta</i>          | 1 | 1 | 0 | 0 | 0 | 0 | 0 | 0 | 0 | 0 | 1 | 0 | 1 | 1 | 0 | 0 | 0 | 0 | 0 | 0 | 0 | 0 | 0 | 0 | 0 | 0 | 0 | 0 | 0 | 0 | 0 | 0 | 0  | 1  | 6  |
| Pteridaceae   | <i>Ceratopteris</i>  | <i>thalictroides</i>    | 0 | 0 | 0 | 0 | 0 | 1 | 0 | 0 | 0 | 0 | 0 | 0 | 0 | 0 | 1 | 0 | 0 | 0 | 0 | 0 | 0 | 0 | 0 | 0 | 0 | 0 | 0 | 0 | 0 | 0 | 0 | 0 | 0  | 0  | 2  |
| Pteridaceae   | <i>Ceratopteris</i>  | <i>richardii</i>        | 1 | 0 | 0 | 0 | 0 | 0 | 0 | 0 | 0 | 0 | 0 | 0 | 0 | 0 | 0 | 0 | 0 | 0 | 0 | 0 | 0 | 0 | 0 | 0 | 0 | 0 | 0 | 0 | 0 | 0 | 0 | 0 | 0  | 1  | 2  |
| Pteridaceae   | <i>Cheilanthes</i>   | <i>acrostica</i>        | 0 | 0 | 0 | 0 | 0 | 0 | 0 | 0 | 0 | 0 | 0 | 0 | 0 | 0 | 0 | 0 | 0 | 0 | 0 | 0 | 0 | 0 | 0 | 0 | 0 | 0 | 0 | 0 | 0 | 0 | 0 | 0 | 1  | 0  | 1  |



|             |              |                  |   |   |   |   |   |   |   |   |   |   |   |   |   |   |   |   |   |   |   |   |   |   |   |   |   |   |   |    |    |
|-------------|--------------|------------------|---|---|---|---|---|---|---|---|---|---|---|---|---|---|---|---|---|---|---|---|---|---|---|---|---|---|---|----|----|
| Pteridaceae | Coniogramme  | madagascariensis | 0 | 0 | 0 | 0 | 0 | 0 | 0 | 0 | 0 | 0 | 0 | 0 | 0 | 0 | 0 | 0 | 0 | 0 | 0 | 0 | 0 | 0 | 0 | 0 | 0 | 0 | 1 | 1  |    |
| Pteridaceae | Doryopteris  | concolor         | 1 | 1 | 0 | 0 | 1 | 0 | 0 | 0 | 0 | 0 | 0 | 0 | 1 | 1 | 1 | 1 | 1 | 1 | 0 | 1 | 1 | 0 | 0 | 0 | 0 | 0 | 0 | 1  | 12 |
| Pteridaceae | Doryopteris  | cordifolia       | 0 | 0 | 0 | 0 | 0 | 0 | 0 | 0 | 0 | 0 | 0 | 0 | 0 | 0 | 0 | 0 | 0 | 0 | 0 | 0 | 0 | 0 | 0 | 0 | 0 | 0 | 1 | 1  |    |
| Pteridaceae | Doryopteris  | humbertii        | 0 | 0 | 0 | 0 | 0 | 0 | 0 | 0 | 0 | 0 | 0 | 0 | 0 | 0 | 0 | 0 | 0 | 0 | 0 | 0 | 0 | 0 | 0 | 0 | 0 | 0 | 1 | 1  |    |
| Pteridaceae | Doryopteris  | kitchingii       | 0 | 0 | 0 | 0 | 0 | 0 | 0 | 0 | 0 | 0 | 0 | 0 | 0 | 0 | 0 | 0 | 0 | 0 | 0 | 0 | 0 | 0 | 0 | 0 | 0 | 0 | 1 | 1  |    |
| Pteridaceae | Doryopteris  | latiloba         | 0 | 0 | 0 | 0 | 0 | 0 | 0 | 0 | 0 | 0 | 0 | 0 | 0 | 0 | 0 | 0 | 0 | 0 | 0 | 0 | 0 | 0 | 0 | 0 | 0 | 0 | 1 | 1  |    |
| Pteridaceae | Doryopteris  | madagascariensis | 0 | 0 | 0 | 0 | 0 | 0 | 0 | 0 | 0 | 0 | 0 | 0 | 0 | 0 | 0 | 0 | 0 | 0 | 0 | 0 | 0 | 0 | 0 | 0 | 0 | 0 | 1 | 1  |    |
| Pteridaceae | Doryopteris  | nicklesii        | 0 | 1 | 0 | 0 | 0 | 0 | 0 | 0 | 0 | 0 | 0 | 0 | 1 | 1 | 0 | 0 | 0 | 0 | 0 | 0 | 0 | 0 | 0 | 0 | 0 | 0 | 1 | 4  |    |
| Pteridaceae | Doryopteris  | pedatoides       | 0 | 0 | 0 | 0 | 0 | 0 | 0 | 0 | 0 | 0 | 0 | 0 | 0 | 0 | 0 | 0 | 0 | 0 | 0 | 0 | 0 | 0 | 0 | 0 | 0 | 0 | 1 | 1  |    |
| Pteridaceae | Doryopteris  | pilosa           | 0 | 0 | 0 | 0 | 0 | 0 | 0 | 0 | 0 | 0 | 0 | 0 | 0 | 0 | 0 | 0 | 0 | 0 | 0 | 0 | 0 | 0 | 0 | 0 | 0 | 0 | 1 | 1  |    |
| Pteridaceae | Eriosorus    | cheilanthoides   | 0 | 0 | 0 | 0 | 0 | 0 | 0 | 0 | 0 | 0 | 0 | 0 | 0 | 0 | 0 | 0 | 0 | 0 | 0 | 0 | 0 | 0 | 0 | 1 | 1 | 0 | 0 | 2  |    |
| Pteridaceae | Negripteris  | scioana          | 0 | 0 | 0 | 0 | 0 | 0 | 0 | 0 | 0 | 0 | 0 | 1 | 0 | 1 | 0 | 0 | 0 | 0 | 0 | 0 | 0 | 0 | 0 | 0 | 0 | 0 | 0 | 2  |    |
| Pteridaceae | Negripteris  | tricholepifera   | 0 | 0 | 0 | 0 | 0 | 0 | 0 | 0 | 0 | 0 | 0 | 1 | 0 | 1 | 0 | 0 | 0 | 0 | 0 | 0 | 0 | 0 | 0 | 0 | 0 | 0 | 0 | 2  |    |
| Pteridaceae | Ochropteris  | pallens          | 0 | 0 | 0 | 0 | 0 | 0 | 0 | 0 | 0 | 0 | 0 | 0 | 0 | 0 | 0 | 0 | 0 | 0 | 0 | 0 | 0 | 0 | 0 | 0 | 0 | 0 | 1 | 1  |    |
| Pteridaceae | Pellaea      | angolensis       | 0 | 0 | 0 | 0 | 0 | 0 | 0 | 0 | 0 | 0 | 0 | 0 | 0 | 0 | 0 | 0 | 0 | 0 | 0 | 1 | 0 | 0 | 0 | 0 | 0 | 0 | 0 | 1  |    |
| Pteridaceae | Pellaea      | angulosa         | 0 | 0 | 0 | 0 | 0 | 0 | 0 | 0 | 0 | 0 | 0 | 0 | 1 | 1 | 0 | 0 | 0 | 0 | 0 | 0 | 0 | 0 | 0 | 0 | 0 | 0 | 1 | 3  |    |
| Pteridaceae | Pellaea      | boivinii         | 0 | 0 | 0 | 0 | 0 | 0 | 0 | 0 | 0 | 0 | 0 | 0 | 1 | 1 | 1 | 1 | 1 | 0 | 0 | 0 | 0 | 0 | 0 | 0 | 0 | 0 | 1 | 5  |    |
| Pteridaceae | Pellaea      | calomelanos      | 0 | 0 | 0 | 0 | 0 | 0 | 0 | 0 | 0 | 0 | 0 | 1 | 1 | 1 | 1 | 1 | 1 | 1 | 1 | 1 | 1 | 0 | 0 | 0 | 0 | 0 | 1 | 10 |    |
| Pteridaceae | Pellaea      | doniana          | 1 | 1 | 0 | 0 | 0 | 1 | 1 | 1 | 1 | 1 | 1 | 0 | 1 | 1 | 1 | 0 | 0 | 0 | 0 | 1 | 0 | 0 | 0 | 0 | 0 | 0 | 0 | 12 |    |
| Pteridaceae | Pellaea      | dura             | 0 | 0 | 0 | 0 | 0 | 0 | 0 | 0 | 0 | 0 | 0 | 0 | 1 | 1 | 1 | 1 | 0 | 0 | 1 | 0 | 0 | 0 | 0 | 0 | 0 | 0 | 1 | 6  |    |
| Pteridaceae | Pellaea      | holstii          | 0 | 0 | 0 | 0 | 0 | 1 | 0 | 0 | 0 | 0 | 1 | 0 | 0 | 1 | 1 | 0 | 0 | 0 | 0 | 0 | 0 | 0 | 0 | 0 | 0 | 0 | 0 | 4  |    |
| Pteridaceae | Pellaea      | leucomelas       | 0 | 0 | 0 | 0 | 0 | 0 | 0 | 0 | 0 | 0 | 0 | 0 | 0 | 0 | 0 | 0 | 1 | 1 | 0 | 0 | 0 | 0 | 0 | 0 | 0 | 0 | 0 | 2  |    |
| Pteridaceae | Pellaea      | pectiniformis    | 0 | 0 | 0 | 0 | 0 | 1 | 0 | 0 | 0 | 0 | 0 | 1 | 1 | 1 | 1 | 1 | 0 | 0 | 1 | 1 | 0 | 0 | 0 | 0 | 0 | 0 | 1 | 9  |    |
| Pteridaceae | Pellaea      | pteroides        | 0 | 0 | 0 | 0 | 0 | 0 | 0 | 0 | 0 | 0 | 0 | 0 | 0 | 0 | 0 | 0 | 0 | 1 | 0 | 0 | 0 | 0 | 0 | 0 | 0 | 0 | 0 | 1  |    |
| Pteridaceae | Pellaea      | rufa             | 0 | 0 | 0 | 0 | 0 | 0 | 0 | 0 | 0 | 0 | 0 | 0 | 0 | 0 | 0 | 0 | 1 | 0 | 0 | 0 | 0 | 0 | 0 | 0 | 0 | 0 | 0 | 1  |    |
| Pteridaceae | Pellaea      | schweinfurthii   | 0 | 0 | 0 | 0 | 0 | 0 | 0 | 0 | 0 | 0 | 0 | 1 | 1 | 1 | 0 | 0 | 0 | 0 | 0 | 0 | 0 | 0 | 0 | 0 | 0 | 0 | 0 | 3  |    |
| Pteridaceae | Pellaea      | striata          | 0 | 0 | 0 | 0 | 0 | 0 | 0 | 0 | 0 | 0 | 0 | 0 | 0 | 0 | 0 | 0 | 0 | 0 | 0 | 0 | 0 | 0 | 0 | 0 | 0 | 0 | 1 | 1  |    |
| Pteridaceae | Pellaea      | swynnertoniana   | 0 | 0 | 0 | 0 | 0 | 0 | 0 | 0 | 0 | 0 | 0 | 0 | 0 | 1 | 0 | 0 | 0 | 0 | 0 | 0 | 0 | 0 | 0 | 0 | 0 | 0 | 0 | 1  |    |
| Pteridaceae | Pellaea      | tomentosa        | 0 | 0 | 0 | 0 | 0 | 0 | 0 | 0 | 0 | 0 | 0 | 0 | 0 | 0 | 0 | 0 | 0 | 0 | 0 | 0 | 0 | 0 | 0 | 0 | 0 | 0 | 1 | 1  |    |
| Pteridaceae | Pellaea      | tripinnata       | 0 | 0 | 0 | 0 | 0 | 0 | 0 | 0 | 0 | 0 | 0 | 0 | 0 | 0 | 0 | 0 | 0 | 0 | 0 | 0 | 0 | 0 | 0 | 0 | 0 | 0 | 1 | 1  |    |
| Pteridaceae | Pityrogramma | aurantiaca       | 0 | 0 | 0 | 0 | 0 | 0 | 0 | 0 | 0 | 0 | 0 | 1 | 1 | 1 | 0 | 0 | 0 | 0 | 0 | 0 | 0 | 0 | 0 | 0 | 0 | 0 | 0 | 3  |    |
| Pteridaceae | Pityrogramma | argentea         | 1 | 1 | 0 | 0 | 1 | 1 | 1 | 1 | 1 | 1 | 0 | 1 | 1 | 1 | 1 | 1 | 1 | 1 | 1 | 1 | 0 | 0 | 0 | 0 | 0 | 0 | 1 | 19 |    |
| Pteridaceae | Pityrogramma | elongata         | 0 | 0 | 0 | 0 | 0 | 0 | 0 | 0 | 0 | 0 | 0 | 1 | 0 | 0 | 0 | 0 | 0 | 0 | 0 | 0 | 0 | 0 | 0 | 0 | 0 | 0 | 0 | 1  |    |
| Pteridaceae | Pityrogramma | humbertii        | 0 | 0 | 0 | 0 | 0 | 0 | 0 | 0 | 0 | 0 | 0 | 0 | 0 | 0 | 0 | 0 | 0 | 0 | 0 | 0 | 0 | 0 | 0 | 0 | 0 | 0 | 1 | 1  |    |
| Pteridaceae | Pityrogramma | rupicola         | 0 | 0 | 0 | 0 | 0 | 0 | 0 | 0 | 0 | 0 | 0 | 1 | 0 | 1 | 0 | 0 | 0 | 0 | 0 | 0 | 0 | 0 | 0 | 0 | 0 | 0 | 0 | 2  |    |
| Pteridaceae | Pteris       | albersii         | 0 | 0 | 0 | 0 | 0 | 0 | 0 | 0 | 0 | 0 | 0 | 1 | 1 | 0 | 0 | 0 | 0 | 0 | 0 | 0 | 0 | 0 | 0 | 0 | 0 | 0 | 0 | 2  |    |
| Pteridaceae | Pteris       | atrovirens       | 1 | 1 | 0 | 0 | 0 | 1 | 1 | 1 | 1 | 0 | 1 | 1 | 1 | 0 | 0 | 0 | 0 | 0 | 1 | 0 | 0 | 0 | 0 | 0 | 0 | 0 | 0 | 11 |    |
| Pteridaceae | Pteris       | bavazzanoi       | 0 | 0 | 0 | 0 | 0 | 0 | 0 | 0 | 0 | 0 | 0 | 0 | 1 | 0 | 1 | 1 | 1 | 0 | 0 | 0 | 0 | 0 | 0 | 0 | 0 | 0 | 0 | 4  |    |
| Pteridaceae | Pteris       | buchananii       | 0 | 0 | 0 | 0 | 0 | 0 | 0 | 0 | 0 | 0 | 0 | 1 | 1 | 1 | 1 | 1 | 1 | 0 | 0 | 0 | 0 | 0 | 0 | 0 | 0 | 0 | 0 | 6  |    |
| Pteridaceae | Pteris       | burtoni          | 1 | 1 | 0 | 0 | 1 | 1 | 0 | 1 | 1 | 0 | 0 | 0 | 1 | 1 | 0 | 0 | 0 | 0 | 0 | 1 | 0 | 0 | 0 | 0 | 0 | 0 | 0 | 10 |    |



|                 |             |                |   |   |   |   |   |   |   |   |   |   |   |   |   |   |   |   |   |   |   |   |   |   |   |   |   |   |   |    |    |
|-----------------|-------------|----------------|---|---|---|---|---|---|---|---|---|---|---|---|---|---|---|---|---|---|---|---|---|---|---|---|---|---|---|----|----|
| Schizaeaceae    | Anemia      | perrieriana    | 0 | 0 | 0 | 0 | 0 | 0 | 0 | 0 | 0 | 0 | 0 | 0 | 0 | 0 | 0 | 0 | 0 | 0 | 0 | 0 | 0 | 0 | 0 | 0 | 0 | 0 | 1 | 1  |    |
| Schizaeaceae    | Anemia      | simii          | 0 | 0 | 0 | 0 | 0 | 0 | 0 | 0 | 0 | 0 | 0 | 0 | 0 | 0 | 1 | 1 | 0 | 0 | 0 | 0 | 0 | 0 | 0 | 0 | 0 | 0 | 0 | 2  |    |
| Schizaeaceae    | Anemia      | schimperiana   | 0 | 0 | 0 | 0 | 0 | 0 | 0 | 0 | 0 | 0 | 1 | 0 | 1 | 0 | 0 | 0 | 0 | 0 | 0 | 0 | 0 | 0 | 0 | 0 | 0 | 0 | 1 | 3  |    |
| Schizaeaceae    | Anemia      | sessilis       | 1 | 0 | 0 | 0 | 0 | 0 | 0 | 0 | 0 | 0 | 0 | 0 | 0 | 0 | 0 | 0 | 0 | 0 | 0 | 0 | 0 | 0 | 0 | 0 | 0 | 0 | 0 | 1  |    |
| Schizaeaceae    | Lygodium    | kerstenii      | 0 | 0 | 0 | 0 | 0 | 0 | 0 | 0 | 0 | 0 | 0 | 0 | 0 | 0 | 1 | 0 | 0 | 0 | 0 | 0 | 0 | 0 | 0 | 0 | 0 | 0 | 1 | 2  |    |
| Schizaeaceae    | Lygodium    | lanceolatum    | 0 | 0 | 0 | 0 | 0 | 0 | 0 | 0 | 0 | 0 | 0 | 0 | 0 | 0 | 0 | 0 | 0 | 0 | 0 | 0 | 0 | 0 | 0 | 0 | 0 | 0 | 1 | 1  |    |
| Schizaeaceae    | Lygodium    | microphyllum   | 1 | 1 | 0 | 0 | 0 | 1 | 0 | 0 | 0 | 1 | 0 | 0 | 1 | 1 | 1 | 1 | 0 | 0 | 0 | 1 | 0 | 0 | 0 | 0 | 0 | 0 | 0 | 9  |    |
| Schizaeaceae    | Lygodium    | smithianum     | 1 | 1 | 0 | 0 | 1 | 1 | 0 | 0 | 1 | 0 | 1 | 0 | 0 | 0 | 0 | 0 | 0 | 0 | 1 | 0 | 0 | 0 | 0 | 0 | 0 | 0 | 0 | 7  |    |
| Schizaeaceae    | Mohria      | caffrorum      | 0 | 0 | 0 | 0 | 0 | 0 | 0 | 0 | 0 | 0 | 0 | 0 | 1 | 0 | 0 | 0 | 1 | 1 | 0 | 0 | 0 | 0 | 0 | 0 | 0 | 0 | 0 | 3  |    |
| Schizaeaceae    | Mohria      | lepigera       | 0 | 0 | 0 | 0 | 0 | 0 | 0 | 0 | 0 | 0 | 0 | 1 | 1 | 1 | 1 | 0 | 0 | 0 | 0 | 0 | 0 | 0 | 0 | 0 | 0 | 0 | 1 | 5  |    |
| Schizaeaceae    | Mohria      | marginalis     | 0 | 0 | 0 | 0 | 0 | 0 | 0 | 0 | 0 | 0 | 0 | 1 | 0 | 0 | 0 | 1 | 0 | 0 | 0 | 0 | 0 | 0 | 0 | 0 | 0 | 0 | 0 | 2  |    |
| Schizaeaceae    | Mohria      | nudiuscula     | 0 | 0 | 0 | 0 | 0 | 0 | 0 | 0 | 0 | 0 | 0 | 0 | 0 | 1 | 1 | 1 | 0 | 0 | 0 | 0 | 0 | 0 | 0 | 0 | 0 | 0 | 1 | 4  |    |
| Schizaeaceae    | Mohria      | rigida         | 0 | 0 | 0 | 0 | 0 | 0 | 0 | 0 | 0 | 0 | 0 | 0 | 0 | 0 | 0 | 1 | 0 | 0 | 0 | 0 | 0 | 0 | 0 | 0 | 0 | 0 | 0 | 1  |    |
| Schizaeaceae    | Mohria      | vestita        | 0 | 0 | 0 | 0 | 0 | 0 | 0 | 0 | 0 | 0 | 0 | 0 | 1 | 0 | 1 | 1 | 1 | 0 | 0 | 1 | 0 | 0 | 0 | 0 | 0 | 0 | 1 | 6  |    |
| Schizaeaceae    | Schizaea    | confusa        | 0 | 0 | 0 | 0 | 0 | 0 | 0 | 0 | 0 | 0 | 0 | 0 | 0 | 0 | 0 | 0 | 0 | 0 | 0 | 0 | 0 | 0 | 0 | 0 | 0 | 0 | 1 | 1  |    |
| Schizaeaceae    | Schizaea    | dichotoma      | 0 | 0 | 0 | 0 | 0 | 0 | 0 | 0 | 0 | 0 | 0 | 0 | 1 | 1 | 0 | 0 | 0 | 0 | 0 | 0 | 0 | 0 | 0 | 0 | 0 | 0 | 1 | 3  |    |
| Schizaeaceae    | Schizaea    | pectinata      | 0 | 0 | 0 | 0 | 0 | 0 | 0 | 0 | 0 | 0 | 0 | 0 | 0 | 1 | 1 | 1 | 1 | 1 | 0 | 0 | 1 | 0 | 0 | 0 | 0 | 0 | 1 | 7  |    |
| Schizaeaceae    | Schizaea    | tenella        | 0 | 0 | 0 | 0 | 0 | 0 | 0 | 0 | 0 | 0 | 0 | 0 | 0 | 0 | 0 | 1 | 1 | 1 | 0 | 0 | 0 | 0 | 0 | 0 | 0 | 0 | 0 | 3  |    |
| Selaginellaceae | Selaginella | bemarahensis   | 0 | 0 | 0 | 0 | 0 | 0 | 0 | 0 | 0 | 0 | 0 | 0 | 0 | 0 | 0 | 0 | 0 | 0 | 0 | 0 | 0 | 0 | 0 | 0 | 0 | 0 | 1 | 1  |    |
| Selaginellaceae | Selaginella | buchholzii     | 1 | 1 | 1 | 0 | 0 | 0 | 0 | 0 | 0 | 0 | 1 | 0 | 0 | 0 | 0 | 0 | 0 | 0 | 0 | 0 | 0 | 0 | 0 | 0 | 0 | 0 | 0 | 4  |    |
| Selaginellaceae | Selaginella | blepharophylla | 1 | 0 | 0 | 0 | 0 | 0 | 0 | 0 | 0 | 0 | 0 | 0 | 0 | 0 | 0 | 0 | 0 | 0 | 0 | 0 | 0 | 0 | 0 | 0 | 0 | 0 | 0 | 1  |    |
| Selaginellaceae | Selaginella | cathedrifolia  | 1 | 1 | 1 | 0 | 0 | 1 | 0 | 1 | 1 | 0 | 0 | 0 | 0 | 0 | 0 | 0 | 0 | 0 | 1 | 0 | 0 | 0 | 0 | 0 | 0 | 0 | 0 | 8  |    |
| Selaginellaceae | Selaginella | caffrorum      | 0 | 0 | 0 | 0 | 0 | 0 | 0 | 0 | 0 | 0 | 1 | 1 | 1 | 1 | 0 | 1 | 1 | 0 | 0 | 1 | 0 | 0 | 0 | 0 | 0 | 0 | 0 | 7  |    |
| Selaginellaceae | Selaginella | dregei         | 0 | 0 | 0 | 0 | 0 | 0 | 0 | 0 | 0 | 0 | 0 | 1 | 1 | 1 | 1 | 1 | 0 | 0 | 0 | 1 | 0 | 0 | 0 | 0 | 0 | 0 | 0 | 6  |    |
| Selaginellaceae | Selaginella | erythropus     | 0 | 0 | 0 | 0 | 0 | 0 | 0 | 0 | 0 | 0 | 0 | 0 | 1 | 0 | 0 | 0 | 0 | 0 | 0 | 0 | 0 | 0 | 0 | 0 | 0 | 0 | 0 | 1  |    |
| Selaginellaceae | Selaginella | eublepharis    | 0 | 0 | 0 | 0 | 0 | 0 | 0 | 0 | 0 | 0 | 0 | 0 | 1 | 1 | 0 | 0 | 0 | 0 | 0 | 0 | 0 | 0 | 0 | 0 | 0 | 0 | 0 | 2  |    |
| Selaginellaceae | Selaginella | fissidentoides | 0 | 0 | 0 | 0 | 0 | 0 | 0 | 0 | 0 | 0 | 0 | 0 | 0 | 0 | 0 | 0 | 0 | 0 | 0 | 0 | 0 | 0 | 0 | 0 | 0 | 0 | 1 | 1  |    |
| Selaginellaceae | Selaginella | goudotiana     | 0 | 1 | 0 | 1 | 1 | 0 | 0 | 0 | 1 | 0 | 1 | 0 | 1 | 1 | 1 | 1 | 0 | 0 | 0 | 0 | 1 | 0 | 0 | 0 | 0 | 0 | 0 | 1  | 12 |
| Selaginellaceae | Selaginella | grallipes      | 0 | 0 | 0 | 0 | 0 | 1 | 0 | 0 | 0 | 0 | 1 | 0 | 0 | 0 | 0 | 0 | 0 | 0 | 0 | 0 | 0 | 0 | 0 | 0 | 0 | 0 | 0 | 2  |    |
| Selaginellaceae | Selaginella | imbricata      | 0 | 0 | 0 | 0 | 0 | 0 | 0 | 0 | 0 | 0 | 1 | 0 | 1 | 0 | 0 | 1 | 0 | 0 | 0 | 0 | 0 | 0 | 0 | 0 | 0 | 0 | 1 | 4  |    |
| Selaginellaceae | Selaginella | kalbreyeri     | 1 | 1 | 1 | 0 | 1 | 0 | 0 | 0 | 1 | 0 | 0 | 0 | 1 | 1 | 0 | 0 | 0 | 0 | 0 | 0 | 0 | 0 | 0 | 0 | 0 | 0 | 0 | 7  |    |
| Selaginellaceae | Selaginella | kivuensis      | 0 | 0 | 0 | 0 | 0 | 0 | 0 | 0 | 0 | 1 | 0 | 0 | 1 | 0 | 0 | 0 | 0 | 0 | 0 | 0 | 0 | 0 | 0 | 0 | 0 | 0 | 0 | 2  |    |
| Selaginellaceae | Selaginella | kraussiana     | 1 | 0 | 1 | 0 | 1 | 0 | 0 | 0 | 1 | 0 | 0 | 1 | 1 | 0 | 1 | 1 | 1 | 1 | 0 | 1 | 0 | 0 | 0 | 0 | 0 | 0 | 0 | 12 |    |
| Selaginellaceae | Selaginella | leoneensis     | 1 | 0 | 0 | 0 | 0 | 0 | 0 | 0 | 0 | 0 | 0 | 0 | 0 | 0 | 0 | 0 | 0 | 0 | 0 | 0 | 0 | 0 | 0 | 0 | 0 | 0 | 0 | 1  |    |
| Selaginellaceae | Selaginella | lewalleana     | 0 | 0 | 0 | 0 | 0 | 0 | 0 | 0 | 0 | 0 | 0 | 1 | 0 | 0 | 0 | 0 | 0 | 0 | 0 | 0 | 0 | 0 | 0 | 0 | 0 | 0 | 0 | 1  |    |
| Selaginellaceae | Selaginella | mannii         | 0 | 0 | 0 | 0 | 0 | 0 | 1 | 0 | 0 | 0 | 0 | 0 | 0 | 0 | 0 | 0 | 0 | 0 | 0 | 0 | 0 | 0 | 0 | 0 | 0 | 0 | 0 | 1  |    |
| Selaginellaceae | Selaginella | marinii        | 0 | 0 | 0 | 0 | 0 | 0 | 0 | 0 | 0 | 0 | 0 | 0 | 0 | 0 | 0 | 0 | 0 | 0 | 0 | 0 | 0 | 0 | 0 | 0 | 0 | 0 | 0 | 1  | 1  |
| Selaginellaceae | Selaginella | mittenii       | 0 | 0 | 0 | 0 | 0 | 0 | 0 | 0 | 0 | 0 | 0 | 1 | 1 | 1 | 1 | 1 | 0 | 0 | 0 | 1 | 0 | 0 | 0 | 0 | 0 | 0 | 0 | 6  |    |
| Selaginellaceae | Selaginella | molleri        | 0 | 0 | 0 | 0 | 0 | 0 | 1 | 0 | 1 | 0 | 0 | 0 | 0 | 0 | 0 | 0 | 0 | 0 | 0 | 0 | 0 | 0 | 0 | 0 | 0 | 0 | 0 | 2  |    |
| Selaginellaceae | Selaginella | molliceps      | 1 | 1 | 1 | 0 | 1 | 1 | 1 | 1 | 0 | 1 | 0 | 0 | 1 | 1 | 1 | 0 | 0 | 0 | 0 | 0 | 1 | 0 | 0 | 0 | 0 | 0 | 0 | 13 |    |







|              |          |                     |     |     |    |    |     |     |     |    |     |    |     |    |    |     |     |     |     |     |     |    |    |     |    |    |   |    |    |    |     |    |    |
|--------------|----------|---------------------|-----|-----|----|----|-----|-----|-----|----|-----|----|-----|----|----|-----|-----|-----|-----|-----|-----|----|----|-----|----|----|---|----|----|----|-----|----|----|
| Vittariaceae | Vittaria | guineensis          | 1   | 1   | 1  | 0  | 1   | 1   | 1   | 1  | 1   | 1  | 1   | 0  | 1  | 1   | 1   | 1   | 0   | 0   | 0   | 0  | 0  | 1   | 0  | 0  | 0 | 0  | 0  | 0  | 0   | 0  | 15 |
| Vittariaceae | Vittaria | hildebrandtii       | 0   | 0   | 0  | 0  | 0   | 0   | 0   | 0  | 0   | 0  | 0   | 0  | 0  | 0   | 0   | 0   | 0   | 0   | 0   | 0  | 0  | 0   | 0  | 0  | 0 | 0  | 0  | 0  | 0   | 1  | 1  |
| Vittariaceae | Vittaria | humblotii           | 0   | 0   | 0  | 0  | 0   | 0   | 0   | 0  | 0   | 0  | 0   | 0  | 0  | 0   | 0   | 0   | 0   | 0   | 0   | 0  | 0  | 0   | 0  | 0  | 0 | 0  | 0  | 0  | 1   | 1  |    |
| Vittariaceae | Vittaria | isoetifolia         | 0   | 0   | 0  | 0  | 1   | 0   | 1   | 1  | 1   | 1  | 0   | 0  | 0  | 1   | 1   | 1   | 1   | 1   | 1   | 0  | 0  | 0   | 0  | 0  | 0 | 0  | 0  | 0  | 1   | 13 |    |
| Vittariaceae | Vittaria | owariensis          | 1   | 1   | 0  | 0  | 1   | 1   | 1   | 1  | 0   | 0  | 0   | 0  | 0  | 0   | 1   | 0   | 0   | 0   | 0   | 0  | 0  | 0   | 0  | 0  | 0 | 0  | 0  | 0  | 0   | 7  |    |
| Vittariaceae | Vittaria | schaeferi           | 0   | 0   | 0  | 0  | 0   | 0   | 0   | 0  | 0   | 0  | 1   | 0  | 0  | 0   | 0   | 0   | 0   | 0   | 0   | 0  | 0  | 0   | 0  | 0  | 0 | 0  | 0  | 0  | 0   | 1  |    |
| Vittariaceae | Vittaria | scolopendrina       | 0   | 0   | 0  | 0  | 0   | 0   | 0   | 0  | 0   | 0  | 0   | 0  | 0  | 0   | 0   | 0   | 0   | 0   | 0   | 0  | 0  | 0   | 0  | 0  | 0 | 0  | 0  | 0  | 1   | 1  |    |
| Vittariaceae | Vittaria | vittarioides        | 0   | 0   | 0  | 0  | 0   | 0   | 0   | 0  | 0   | 0  | 0   | 0  | 0  | 0   | 0   | 0   | 0   | 0   | 0   | 0  | 0  | 0   | 0  | 0  | 0 | 1  | 1  | 0  | 0   | 2  |    |
| Vittariaceae | Vittaria | volkensisii         | 0   | 0   | 0  | 0  | 0   | 0   | 0   | 0  | 0   | 0  | 0   | 1  | 1  | 1   | 1   | 1   | 0   | 0   | 0   | 0  | 0  | 0   | 0  | 0  | 0 | 0  | 0  | 0  | 0   | 5  |    |
|              |          | <i>Total / area</i> | 167 | 123 | 39 | 51 | 184 | 113 | 139 | 80 | 204 | 42 | 117 | 28 | 76 | 242 | 313 | 337 | 188 | 206 | 101 | 85 | 48 | 163 | 31 | 10 | 9 | 36 | 30 | 29 | 557 |    |    |

Appendix S2. Climatic variables in the OGU. Most data were obtained from the IPCC and WMO web pages (<http://ipcc-ddc.cru.uea.ac.uk/> and <http://www.wmo.ch/indexflash.html>) and from *CLINO* 1931-1960) (Anonymous, 1971). No climatic data were available for Annobón and Porto Principe. When one of selected areas has more than one place with complete climatic information we show the mean among these data.

| OGU                 | Kira warmth index | Difference between max. and min. of monthly mean of temperatures (°C) | Mean sun hours / year | Relative humidity (%) | Mean year rainfall (mm) | Driest month rainfall (mm) | Cloudiness (%) |
|---------------------|-------------------|-----------------------------------------------------------------------|-----------------------|-----------------------|-------------------------|----------------------------|----------------|
| Madagascar          | 141               | 6.3                                                                   | 222                   | 79.58                 | 1191                    | 10                         | 58.7           |
| Kipengere           | 191               | 6.3                                                                   | 223                   | 69.58                 | 1124                    | 0                          | 59.5           |
| Aberdares           | 150               | 3.9                                                                   | 211.2                 | 72.75                 | 925                     | 26                         | 76.4           |
| Rukiya              | 218               | 3.2                                                                   | 241.3                 | 68.33                 | 1540                    | 16                         | 82.3           |
| Drakensberg         | 149               | 9.5                                                                   | 255.4                 | 64.25                 | 840                     | 0                          | 40.7           |
| Bioko               | 220               | 2.2                                                                   | 101                   | 86                    | 4200                    | 24                         | 86.4           |
| Inyanga             | 163               | 7.2                                                                   | 236                   | 67.17                 | 863                     | 0                          | 57.5           |
| Cameroon Mt         | 257               | 2.7                                                                   | 106.2                 | 85.75                 | 4109                    | 61                         | 83.3           |
| Loma Mt             | 258               | 3.8                                                                   | 215.8                 | 67.5                  | 1596                    | 0                          | 62             |
| Angola              | 163               | 4.7                                                                   | 190.4                 | 58.25                 | 1341                    | 0                          | 60.7           |
| S. Tomé             | 246               | 3.8                                                                   | 138.8                 | 81.08                 | 872                     | 0                          | 92.8           |
| Kwahu pl.           | 247               | 3.3                                                                   | 162.1                 | 78.58                 | 1465                    | 26                         | 74             |
| Río Muni            | 233               | 2.3                                                                   | 106                   | 86.08                 | 1857                    | 23                         | 84.3           |
| Moukandé Mt         | 234               | 2.9                                                                   | 180                   | 81.25                 | 1861                    | 7                          | 90             |
| Knysna mts.         | 125               | 6.6                                                                   | 237.2                 | 78.83                 | 777                     | 34                         | 46.3           |
| Table mts.          | 131               | 8.7                                                                   | 254.9                 | 74.92                 | 526                     | 11                         | 43.7           |
| Porto Principe      | -                 | -                                                                     | -                     | -                     | -                       | -                          | -              |
| Ethiopia            | 141               | 4.8                                                                   | 209.2                 | 61.25                 | 446                     | 5                          | 45.4           |
| Oku Mt              | 196               | 2.7                                                                   | 196.5                 | 75.17                 | 2096                    | 7                          | 72             |
| Namibia             | 168               | 10.2                                                                  | 294.7                 | 34.42                 | 375                     | 0                          | 25.5           |
| Annobón             | -                 | -                                                                     | -                     | -                     | -                       | -                          | -              |
| Togo Mt             | 251               | 3.9                                                                   | 180                   | 75.25                 | 1450                    | 19                         | 69.4           |
| Tristan da Cunha I. | 115               | 6.4                                                                   | 100.1                 | 81.58                 | 1655                    | 88                         | 75.2           |
| Helena I.           | 158               | 4.7                                                                   | 165                   | 80                    | 1250                    | 10                         | 75.8           |
| Gough I.            | 82.6              | 5.4                                                                   | 118.8                 | 80.33                 | 3397                    | 197                        | 76.8           |

|              |     |      |       |       |      |     |      |
|--------------|-----|------|-------|-------|------|-----|------|
| Cape Verde   | 219 | 7.4  | 250   | 57    | 650  | 0   | 43   |
| Jebel Marra  | 237 | 10.8 | 276   | 36.67 | 287  | 0   | 51.6 |
| Ascension I. | 248 | 3.5  | 170   | 83    | 1800 | 4   | 72.4 |
| Marion I.    | 1.3 | 4.1  | 10.22 | 82.33 | 2451 | 167 | 75.3 |

Appendix S3. Correlation coefficients and signification (in brackets) in standard pairwise regression analysis (SPR) of the environmental factors

|                                                                  | Log area<br>(Log m <sup>2</sup> ) | Log Kira<br>warmth<br>index<br>(Log) | Log<br>differenc<br>e<br>between<br>max. and<br>min. of<br>monthly<br>mean of<br>temperat<br>ures<br>(Log °C) | Log<br>mean sun<br>hours /<br>year<br>(Log h) | Arc-sin of<br>mean<br>relative<br>humidity<br>(Arc-sin of<br>proportion) | Log<br>mean<br>year<br>rainfall<br>(Log<br>mm) | Log driest<br>month rainfall<br>(Log mm) | Arc-sin of<br>cloudiness<br>(Arc-sin of<br>proportion) | Log<br>elevation | Log<br>distance to<br>the nearest<br>site<br>(Log Km) |
|------------------------------------------------------------------|-----------------------------------|--------------------------------------|---------------------------------------------------------------------------------------------------------------|-----------------------------------------------|--------------------------------------------------------------------------|------------------------------------------------|------------------------------------------|--------------------------------------------------------|------------------|-------------------------------------------------------|
| Log Kira warmth index<br>(Log)                                   |                                   | 1<br>p= ---                          |                                                                                                               |                                               |                                                                          |                                                |                                          |                                                        |                  |                                                       |
| Log difference between<br>max. and min.<br>temperatures (Log °C) | 0.151<br>(0.450)                  | -0.083<br>(0.678)                    | 1<br>p= ---                                                                                                   |                                               |                                                                          |                                                |                                          |                                                        |                  |                                                       |
| Log mean sun hours /<br>year (Log h)                             | 0.449<br>(0.019)                  | 0.820<br>(0.000)                     | 0.371<br>(0.056)                                                                                              | 1<br>p= ---                                   |                                                                          |                                                |                                          |                                                        |                  |                                                       |
| Arc-sin of mean<br>relative humidity<br>(Arc-sin of proportion)  | -0.394<br>(0.042)                 | -0.135<br>(0.501)                    | -0.643<br>(0.000)                                                                                             | -0.439<br>(0.022)                             | 1<br>p= ---                                                              |                                                |                                          |                                                        |                  |                                                       |
| Log mean year rainfall<br>(Log mm)                               | -0.421<br>p=0.028                 | -0.151<br>p=0.452                    | -0.778<br>p=0.000                                                                                             | -0.554<br>p=0.003                             | 0.726<br>p=0.000                                                         | 1<br>p= ---                                    |                                          |                                                        |                  |                                                       |
| Log driest month<br>rainfall<br>(Log mm)                         | -0.417<br>p=0.030                 | -0.433<br>p=0.024                    | -0.403<br>p=0.037                                                                                             | 0.251<br>(0.206)                              | 0.604<br>p=0.001                                                         | 0.616<br>p=0.001                               | 1<br>p= ---                              |                                                        |                  |                                                       |
| Arc-sin of cloudiness<br>(Arc-sin of proportion)                 | -0.401<br>p=0.038                 | -0.020<br>p=0.920                    | -0.798<br>p=0.000                                                                                             | -0.455<br>p=0.017                             | 0.732<br>p=0.000                                                         | 0.771<br>p=0.000                               | 0.481<br>p=0.011                         | 1<br>p= ---                                            |                  |                                                       |
| Log elevation                                                    | 0.453<br>p=0.017                  | 0.187<br>p=0.350                     | 0.025<br>p=0.899                                                                                              | 0.229<br>p=0.249                              | -0.255<br>p=0.199                                                        | -0.123<br>p=0.541                              | -0.270<br>p=0.172                        | -0.032<br>p=0.872                                      | 1<br>p= ---      |                                                       |
| Log distance to the<br>nearest site<br>(Log Km)                  | 0.040<br>p=0.842                  | -0.305<br>p=0.121                    | 0.350<br>p=0.073                                                                                              | -0.109<br>p=0.588                             | -0.268<br>p=0.175                                                        | -0.234<br>p=0.240                              | -0.225<br>p=0.258                        | -0.261<br>p=0.187                                      | 0.023<br>p=0.907 | 1<br>p= ---                                           |



Appendix S5. Number of species and endemics included in the genera which resulted in group 2 (cold-tolerant ferns). First is the number of species, in brackets is the number of species shared with South America and after the bar is the number of endemics. The sites are ordinated by from highest to lowest species richness

| OGU                 | <u>Polystichu</u><br><u>m</u> | <u>Blechnum</u> | <u>Grammiti</u><br><u>s</u> | <u>Lycopodiu</u><br><u>m</u> | <u>Huperzia</u> | <u>Elaphoglossum</u> | Total    | Total non-endemic |
|---------------------|-------------------------------|-----------------|-----------------------------|------------------------------|-----------------|----------------------|----------|-------------------|
| Madagascar          | 6/5                           | 11/5            | 11(1)/5                     | 2/0                          | 21/14           | 35/23                | 86(1)/52 | 34                |
| Kipengere           | 3/1                           | 6/0             | 2/0                         | 1/0                          | 9/0             | 16/0                 | 37/1     | 36                |
| Aberdares           | 5/1                           | 5/0             | 4/0                         | 2/1                          | 9/0             | 14/0                 | 39/2     | 37                |
| Rukiya              | 2/0                           | 1/0             | -                           | 1/0                          | 7/0             | 10/0                 | 21/0     | 21                |
| Drakensberg         | 8/2                           | 6/0             | -                           | 1/0                          | 5/0             | 7/1                  | 27/3     | 24                |
| Bioko               | 2/0                           | 1/0             | -                           | 1/0                          | 4/0             | 7/0                  | 15/0     | 15                |
| Inyanga             | 3/0                           | 5/0             | 1/0                         | 1/0                          | 5/0             | 8/0                  | 23/0     | 23                |
| Cameroon Mt         | 2/0                           | 1/0             | -                           | -                            | 5/0             | 9/0                  | 17/0     | 17                |
| Loma Mt             | -                             | -               | -                           | -                            | 7/0             | 5/0                  | 12/0     | 12                |
| Angola              | -                             | -               | -                           | -                            | -               | 2/0                  | 2/0      | 2                 |
| S. Tomé             | -                             | 1/0             | 3/2                         | 1/0                          | 5/0             | 6/0                  | 16/2     | 14                |
| Kwahu pl.           | -                             | -               | -                           | -                            | -               | -                    | -        | -                 |
| Río Muni            | -                             | -               | -                           | -                            | 1/0             | 1/0                  | 2/0      | 2                 |
| Moukandé Mt         | -                             | -               | -                           | -                            | -               | -                    | -        | -                 |
| Knysna mts.         | -                             | -               | -                           | 2/0                          | 2/0             | 3/0                  | 7/0      | 7                 |
| Table mts.          | -                             | -               | -                           | 2/0                          | 2/0             | 2/0                  | 6/0      | 6                 |
| Ethiopia            | -                             | -               | -                           | 1/0                          | -               | 4/0                  | 5/0      | 5                 |
| Oku Mt              | 2/0                           | -               | -                           | -                            | 2/0             | 2/0                  | 6/0      | 6                 |
| Namibia             | -                             | -               | -                           | -                            | -               | -                    | -        | -                 |
| Togo Mt             | -                             | -               | -                           | -                            | -               | -                    | -        | -                 |
| P. Principe         | -                             | -               | 1/0                         | -                            | 2/0             | 3/0                  | 6/0      | 6                 |
| Tristan da Cunha I. | 1(1)/0                        | 3(1)/0          | 2/0                         | 2(1)/0                       | 2(1)/0          | 7/3                  | 17(4)/3  | 14                |
| Helena I.           | -                             | -               | -                           | 1/1                          | 1/0             | 4/3                  | 6/3      | 3                 |
| Gough I.            | 1(1)/0                        | 3(1)/0          | 2/0                         | 2(1)/0                       | 2(1)/0          | 5/0                  | 15(4)/0  | 15                |
| Annobón             | -                             | -               | -                           | -                            | 1/0             | -                    | 1/0      | 1                 |
| Cape Verde          | -                             | -               | -                           | -                            | -               | -                    | -        | -                 |
| Jebel Marra         | -                             | -               | -                           | -                            | -               | -                    | -        | -                 |
| Ascension I.        | -                             | -               | -                           | -                            | -               | -                    | -        | -                 |
| Marion I.           | 2(1)/1                        | 1(1)/0          | 1/0                         | 1(1)/0                       | 2(1)/0          | 1/1                  | 8(4)/2   | 6                 |
